# Supplementary material for: Spatiotemporal dissemination pattern of SARS-CoV-2 B1.1.28-derived lineages introduced into Uruguay across its southeastern border with Brazil
Source: bioRxiv or medRxiv preprint supplement (doi:10.1101/2021.07.05.21259760), 2021-07-07
Supplement: Supplementary file [file media-7.pdf]

We gratefully acknowledge the following Authors from the Originating laboratories responsible for obtaining the specimens, as well as the Submitting laboratories where the genome data were generated and shared via GISAID, on which this research is based.

All Submitters of data may be contacted directly via [www.gisaid.org](http://www.gisaid.org)

Authors are sorted alphabetically.

| Accession ID                                                                                                                                                                                                                             | Originating Laboratory                                                                                                                                                                           | Submitting Laboratory                                                                                                                                                                            | Authors                                                                                                                                                                                                                                                                                                                                                                                                                                                                                             |
|------------------------------------------------------------------------------------------------------------------------------------------------------------------------------------------------------------------------------------------|--------------------------------------------------------------------------------------------------------------------------------------------------------------------------------------------------|--------------------------------------------------------------------------------------------------------------------------------------------------------------------------------------------------|-----------------------------------------------------------------------------------------------------------------------------------------------------------------------------------------------------------------------------------------------------------------------------------------------------------------------------------------------------------------------------------------------------------------------------------------------------------------------------------------------------|
| EPI_ISL_1000675, EPI_ISL_1000677<br>EPI_ISL_1061032                                                                                                                                                                                      | Instituto de Biotecnologia - UNESP-Botucatu-SP<br>CDL Laboratorio Santos e Vidal LTDA.                                                                                                           | Instituto de Biotecnologia - UNESP-Botucatu-SP<br>Instituto de Medicina Tropical de Sao Paulo                                                                                                    | Leila Sabrina Ullmann; Fábio Sossai Possebon, Camila Dantas Malossi, Paula Rahal, Paulo Inacio da Costa, João Pessoa Araújo Jr.<br>Brazil-UK Centre for Arbovirus Discovery Diagnosis Genomics and Epidemiology (CADDE) Genomic Network - Instituto de Medicina Tropical                                                                                                                                                                                                                            |
| EPI_ISL_1068108, EPI_ISL_1068115,<br>EPI_ISL_1068142, EPI_ISL_1068145,<br>EPI_ISL_1068153, EPI_ISL_1068259,<br>EPI_ISL_1068277<br>EPI_ISL_1068368                                                                                        | Laboratório de Ecologia de Doenças Transmissíveis na<br>Amazonia, Instituto Leonidas e Maria Deane - Fiocruz<br>Amazonia<br>Central Public Health Laboratory - LACEN -Bahia, Salvador,<br>Brazil | Laboratório de Ecologia de Doenças Transmissíveis na<br>Amazonia, Instituto Leonidas e Maria Deane - Fiocruz<br>Amazonia<br>Central Public Health Laboratory - LACEN -Bahia, Salvador,<br>Brazil | Valdinete Nascimento, Victor Souza, André Corado, Fernanda Nascimento, George Silva, Ágatha Costa, Debora Duarte, Karina Pessoa, Matilde Mejia,<br>Luciana Gonçalves, Maria Júlia Brandão, Michele Jesus, Felipe Naveca on behalf of the Fiocruz COVID-19 Genomic Surveillance Network<br>Stephane Tosta, Luciana Oliveira, Vanessa Nardy, Patrícia Cajado, Marcela Gómez, Breno Dominguez, Jaqueline Gomes, Wagner Fonseca, Marta<br>Giovannetti, Luiz Alcantara, Felicidade Pereira, Arabela Leal |
| EPI_ISL_1078986, EPI_ISL_1078987, EPI_ISL_1078988, EPI_ISL_1078989, EPI_ISL_1078993, EPI_ISL_1078995, EPI_ISL_1078997, EPI_ISL_1078999, EPI_ISL_1079000, EPI_ISL_1079004, EPI_ISL_1079007, EPI_ISL_1079165<br>see above                  | IAL Regional de Bauru                                                                                                                                                                            | Instituto Adolfo Lutz, Interdisciplinary Procedures Center,<br>Strategic Laboratory                                                                                                              | Claudio Tavares Sacchi, Claudia Regina Gonçalves, Erica Valesa Ramos Gomes, Karoline Rodrigues Campos                                                                                                                                                                                                                                                                                                                                                                                               |
| EPI_ISL_1086050, EPI_ISL_1086052,<br>EPI_ISL_1086053, EPI_ISL_1086054,<br>EPI_ISL_1086055, EPI_ISL_1086057<br>EPI_ISL_1086374<br>EPI_ISL_1086375                                                                                         | IAL Regional de Bauru<br>LACEN - Laboratório Central de Saúde Pública do Maranhao<br>LACEN - Laboratório Central de Saúde Pública do Rio Grande<br>do Norte                                      | Instituto Adolfo Lutz, Interdisciplinary Procedures Center,<br>Strategic Laboratory<br>Evandro Chagas Institute<br>Evandro Chagas Institute                                                      | Claudio Tavares Sacchi, Claudia Regina Gonçalves, Erica Valesa Ramos Gomes, Karoline Rodrigues Campos, Caio Vinicius Dias Lopes<br>Santos, M.C.; Silva, A.M.; Junior, W.D.C.; Barbagelata, L.S.; Ferreira, J.A.; Sousa, E.M.A.; da Silva, P.S.; Pinheiro, K.C.; L.C.; Sousa Junior, E.C.<br>Santos, M.C.; Silva, A.M.; Junior, W.D.C.; Barbagelata, L.S.; Ferreira, J.A.; Sousa, E.M.A.; da Silva, P.S.; Pinheiro, K.C.; L.C.; Sousa Junior, E.C.                                                   |
| EPI_ISL_1092360, EPI_ISL_1095913                                                                                                                                                                                                         | IAL Regional de Bauru                                                                                                                                                                            | Instituto Adolfo Lutz, Interdisciplinary Procedures Center,<br>Strategic Laboratory                                                                                                              | Claudio Tavares Sacchi, Claudia Regina Gonçalves, Erica Valesa Ramos Gomes, Karoline Rodrigues Campos                                                                                                                                                                                                                                                                                                                                                                                               |
| EPI_ISL_1096123, EPI_ISL_1096126,<br>EPI_ISL_1096128, EPI_ISL_1096129,<br>EPI_ISL_1096130, EPI_ISL_1096133<br>EPI_ISL_1121318, EPI_ISL_1121319                                                                                           | IAL Regional de Bauru<br>Hospital de Campanha COVID 19 Caieiras                                                                                                                                  | Instituto Adolfo Lutz, Interdisciplinary Procedures Center,<br>Strategic Laboratory                                                                                                              | Claudio Tavares Sacchi, Claudia Regina Gonçalves, Erica Valesa Ramos Gomes, Karoline Rodrigues Campos, Caio Vinicius Dias Lopes                                                                                                                                                                                                                                                                                                                                                                     |
| EPI_ISL_1121320, EPI_ISL_1121321<br>EPI_ISL_1121324                                                                                                                                                                                      | IAL Regional de Bauru<br>Complexo Hospitalar Padre Bentode Guarulhos                                                                                                                             | Instituto Adolfo Lutz, Interdisciplinary Procedures Center,<br>Strategic Laboratory                                                                                                              | Claudio Tavares Sacchi, Claudia Regina Gonçalves, Erica Valesa Ramos Gomes, Karoline Rodrigues Campos, Caio Vinicius Dias Lopes                                                                                                                                                                                                                                                                                                                                                                     |
| EPI_ISL_1121325                                                                                                                                                                                                                          | IAL Regional de Santos                                                                                                                                                                           | Instituto Adolfo Lutz, Interdisciplinary Procedures Center,<br>Strategic Laboratory                                                                                                              | Claudio Tavares Sacchi, Claudia Regina Gonçalves, Erica Valesa Ramos Gomes, Karoline Rodrigues Campos, Caio Vinicius Dias Lopes                                                                                                                                                                                                                                                                                                                                                                     |
| EPI_ISL_1139071, EPI_ISL_1139072,<br>EPI_ISL_1139073, EPI_ISL_1139074<br>EPI_ISL_1139075                                                                                                                                                 | Instituto Adolfo Lutz Central<br>Lab Loc - Itapeverica da Serra                                                                                                                                  | Instituto Adolfo Lutz, Interdisciplinary Procedures Center,<br>Strategic Laboratory                                                                                                              | Claudio Tavares Sacchi, Claudia Regina Gonçalves, Erica Valesa Ramos Gomes, Karoline Rodrigues Campos, Caio Vinicius Dias Lopes                                                                                                                                                                                                                                                                                                                                                                     |
| EPI_ISL_1164974, EPI_ISL_1164975<br>EPI_ISL_1164976<br>EPI_ISL_1164979                                                                                                                                                                   | LACEN - Laboratório Central de Saúde Pública do Pará<br>LACEN - Laboratório Central de Saúde Pública do Amapá<br>LACEN - Laboratório Central de Saúde Pública do Maranhao                        | Evandro Chagas Institute<br>Evandro Chagas Institute<br>Evandro Chagas Institute                                                                                                                 | Santos, M.C.; Silva, A.M.; Junior, W.D.C.; Barbagelata, L.S.; Ferreira, J.A.; Sousa, E.M.A.; da Silva, P.S.; Pinheiro, K.C.; L.C.; Sousa Junior, E.C.<br>Santos, M.C.; Silva, A.M.; Junior, W.D.C.; Barbagelata, L.S.; Ferreira, J.A.; Sousa, E.M.A.; da Silva, P.S.; Pinheiro, K.C.; L.C.; Sousa Junior, E.C.<br>Santos, M.C.; Silva, A.M.; Junior, W.D.C.; Barbagelata, L.S.; Ferreira, J.A.; Sousa, E.M.A.; da Silva, P.S.; Pinheiro, K.C.; L.C.; Sousa Junior, E.C.                             |
| EPI_ISL_1164981, EPI_ISL_1164982<br>EPI_ISL_1164983<br>EPI_ISL_1164985<br>EPI_ISL_1164987                                                                                                                                                | LACEN - Laboratório Central de Saúde Pública do Pará<br>LACEN - Laboratório Central de Saúde Pública do Amapá<br>LACEN - Laboratório Central de Saúde Pública do Rio Grande<br>do Norte          | Evandro Chagas Institute<br>Evandro Chagas Institute<br>Evandro Chagas Institute                                                                                                                 | Santos, M.C.; Silva, A.M.; Junior, W.D.C.; Barbagelata, L.S.; Ferreira, J.A.; Sousa, E.M.A.; da Silva, P.S.; Pinheiro, K.C.; L.C.; Sousa Junior, E.C.<br>Santos, M.C.; Silva, A.M.; Junior, W.D.C.; Barbagelata, L.S.; Ferreira, J.A.; Sousa, E.M.A.; da Silva, P.S.; Pinheiro, K.C.; L.C.; Sousa Junior, E.C.                                                                                                                                                                                      |
| EPI_ISL_1164989, EPI_ISL_1164992<br>EPI_ISL_1164993                                                                                                                                                                                      | LACEN - Laboratório Central de Saúde Pública do Paraíba<br>LACEN - Laboratório Central de Saúde Pública do Ceará                                                                                 | Evandro Chagas Institute<br>Evandro Chagas Institute                                                                                                                                             | Santos, M.C.; Silva, A.M.; Junior, W.D.C.; Barbagelata, L.S.; Ferreira, J.A.; Sousa, E.M.A.; da Silva, P.S.; Pinheiro, K.C.; L.C.; Sousa Junior, E.C.<br>Santos, M.C.; Silva, A.M.; Junior, W.D.C.; Barbagelata, L.S.; Ferreira, J.A.; Sousa, E.M.A.; da Silva, P.S.; Pinheiro, K.C.; L.C.; Sousa Junior, E.C.                                                                                                                                                                                      |
| EPI_ISL_1171622, EPI_ISL_1171626,<br>EPI_ISL_1171628, EPI_ISL_1171629,<br>EPI_ISL_1171634, EPI_ISL_1171637,<br>EPI_ISL_1171638, EPI_ISL_1171639,<br>EPI_ISL_1171640                                                                      | IAL Regional de Santos                                                                                                                                                                           | Instituto Adolfo Lutz, Interdisciplinary Procedures Center,<br>Strategic Laboratory                                                                                                              | Claudio Tavares Sacchi, Claudia Regina Gonçalves, Erica Valesa Ramos Gomes, Karoline Rodrigues Campos, Caio Vinicius Dias Lopes                                                                                                                                                                                                                                                                                                                                                                     |
| EPI_ISL_1171641, EPI_ISL_1171642,<br>EPI_ISL_1171643, EPI_ISL_1171644,<br>EPI_ISL_1171645                                                                                                                                                | IAL Regional de Marília                                                                                                                                                                          | Instituto Adolfo Lutz, Interdisciplinary Procedures Center,<br>Strategic Laboratory                                                                                                              | Claudio Tavares Sacchi, Claudia Regina Gonçalves, Erica Valesa Ramos Gomes, Karoline Rodrigues Campos, Caio Vinicius Dias Lopes                                                                                                                                                                                                                                                                                                                                                                     |
| EPI_ISL_1171651, EPI_ISL_1171652, EPI_ISL_1171654, EPI_ISL_1171655, EPI_ISL_1171659, EPI_ISL_1171660, EPI_ISL_1171661, EPI_ISL_1171662, EPI_ISL_1171663, EPI_ISL_1171665, EPI_ISL_1171667, EPI_ISL_1171670, EPI_ISL_1171673<br>see above | IAL Regional de Presidente Prudente                                                                                                                                                              | Instituto Adolfo Lutz, Interdisciplinary Procedures Center,<br>Strategic Laboratory                                                                                                              | Claudio Tavares Sacchi, Claudia Regina Gonçalves, Erica Valesa Ramos Gomes, Karoline Rodrigues Campos, Caio Vinicius Dias Lopes                                                                                                                                                                                                                                                                                                                                                                     |
| EPI_ISL_1182546                                                                                                                                                                                                                          | Laboratório Central do Estado do Paraná                                                                                                                                                          | Coordenação Geral de Laboratórios de Saúde Pública<br>(CGLAB/DAEVS/SVS/MS)                                                                                                                       | Vagner Fonseca, et al.                                                                                                                                                                                                                                                                                                                                                                                                                                                                              |
| EPI_ISL_1182551                                                                                                                                                                                                                          | Fundação Ezequiel Dias (FUNED)                                                                                                                                                                   | Coordenação Geral de Laboratórios de Saúde Pública<br>(CGLAB/DAEVS/SVS/MS)                                                                                                                       | Vagner Fonseca, et al.                                                                                                                                                                                                                                                                                                                                                                                                                                                                              |

|                                                                    |                                                           |                                                                                  |                                                                                                                                  |
|--------------------------------------------------------------------|-----------------------------------------------------------|----------------------------------------------------------------------------------|----------------------------------------------------------------------------------------------------------------------------------|
| EPI_ISL_1182552, EPI_ISL_1182553                                   | Laboratório Central do Estado do Rio de Janeiro           | Coordenação Geral de Laboratórios de Saúde Pública (CGLAB/DAEVS/SVS/MS)          | Vagner Fonseca, et al.                                                                                                           |
| EPI_ISL_1182555                                                    | Fundação Ezequiel Dias (FUNED)                            | Coordenação Geral de Laboratórios de Saúde Pública (CGLAB/DAEVS/SVS/MS)          | Vagner Fonseca, et al.                                                                                                           |
| EPI_ISL_1182556, EPI_ISL_1182557, EPI_ISL_1182558                  | Laboratório Central do Estado do Rio de Janeiro           | Coordenação Geral de Laboratórios de Saúde Pública (CGLAB/DAEVS/SVS/MS)          | Vagner Fonseca, et al.                                                                                                           |
| EPI_ISL_1182559, EPI_ISL_1182560, EPI_ISL_1182561                  | Fundação Ezequiel Dias (FUNED)                            | Coordenação Geral de Laboratórios de Saúde Pública (CGLAB/DAEVS/SVS/MS)          | Vagner Fonseca, et al.                                                                                                           |
| EPI_ISL_1182563, EPI_ISL_1182565                                   | Laboratório Central do Estado do Paraná                   | Coordenação Geral de Laboratórios de Saúde Pública (CGLAB/DAEVS/SVS/MS)          | Vagner Fonseca, et al.                                                                                                           |
| EPI_ISL_1182566                                                    | Fundação Ezequiel Dias (FUNED)                            | Coordenação Geral de Laboratórios de Saúde Pública (CGLAB/DAEVS/SVS/MS)          | Vagner Fonseca, et al.                                                                                                           |
| EPI_ISL_1182568                                                    | Laboratório Central do Estado do Paraná                   | Coordenação Geral de Laboratórios de Saúde Pública (CGLAB/DAEVS/SVS/MS)          | Vagner Fonseca, et al.                                                                                                           |
| EPI_ISL_1182569, EPI_ISL_1182570                                   | Fundação Ezequiel Dias (FUNED)                            | Coordenação Geral de Laboratórios de Saúde Pública (CGLAB/DAEVS/SVS/MS)          | Vagner Fonseca, et al.                                                                                                           |
| EPI_ISL_1182571                                                    | Laboratório Central do Estado do Paraná                   | Coordenação Geral de Laboratórios de Saúde Pública (CGLAB/DAEVS/SVS/MS)          | Vagner Fonseca, et al.                                                                                                           |
| EPI_ISL_1182573, EPI_ISL_1182574                                   | Fundação Ezequiel Dias (FUNED)                            | Coordenação Geral de Laboratórios de Saúde Pública (CGLAB/DAEVS/SVS/MS)          | Vagner Fonseca, et al.                                                                                                           |
| EPI_ISL_1182575                                                    | Laboratório Central do Estado do Paraná                   | Coordenação Geral de Laboratórios de Saúde Pública (CGLAB/DAEVS/SVS/MS)          | Vagner Fonseca, et al.                                                                                                           |
| EPI_ISL_1182577, EPI_ISL_1182578, EPI_ISL_1182579                  | Fundação Ezequiel Dias (FUNED)                            | Coordenação Geral de Laboratórios de Saúde Pública (CGLAB/DAEVS/SVS/MS)          | Vagner Fonseca, et al.                                                                                                           |
| EPI_ISL_1182580, EPI_ISL_1182581, EPI_ISL_1182582, EPI_ISL_1182583 | Laboratório Central do Estado do Paraná                   | Coordenação Geral de Laboratórios de Saúde Pública (CGLAB/DAEVS/SVS/MS)          | Vagner Fonseca, et al.                                                                                                           |
| EPI_ISL_1182585, EPI_ISL_1182586                                   | Fundação Ezequiel Dias (FUNED)                            | Coordenação Geral de Laboratórios de Saúde Pública (CGLAB/DAEVS/SVS/MS)          | Vagner Fonseca, et al.                                                                                                           |
| EPI_ISL_1182588, EPI_ISL_1182589                                   | Laboratório Central do Estado do Paraná                   | Coordenação Geral de Laboratórios de Saúde Pública (CGLAB/DAEVS/SVS/MS)          | Vagner Fonseca, et al.                                                                                                           |
| EPI_ISL_1182590, EPI_ISL_1182591                                   | Fundação Ezequiel Dias (FUNED)                            | Coordenação Geral de Laboratórios de Saúde Pública (CGLAB/DAEVS/SVS/MS)          | Vagner Fonseca, et al.                                                                                                           |
| EPI_ISL_1182592                                                    | Laboratório Central do Estado do Paraná                   | Coordenação Geral de Laboratórios de Saúde Pública (CGLAB/DAEVS/SVS/MS)          | Vagner Fonseca, et al.                                                                                                           |
| EPI_ISL_1182593                                                    | Fundação Ezequiel Dias (FUNED)                            | Coordenação Geral de Laboratórios de Saúde Pública (CGLAB/DAEVS/SVS/MS)          | Vagner Fonseca, et al.                                                                                                           |
| EPI_ISL_1182594, EPI_ISL_1182596                                   | Laboratório Central do Estado do Paraná                   | Coordenação Geral de Laboratórios de Saúde Pública (CGLAB/DAEVS/SVS/MS)          | Vagner Fonseca, et al.                                                                                                           |
| EPI_ISL_1182597                                                    | Laboratório Central de Saúde Pública do Rio Grande do Sul | Coordenação Geral de Laboratórios de Saúde Pública (CGLAB/DAEVS/SVS/MS)          | Vagner Fonseca, et al.                                                                                                           |
| EPI_ISL_1182598, EPI_ISL_1182600                                   | Fundação Ezequiel Dias (FUNED)                            | Coordenação Geral de Laboratórios de Saúde Pública (CGLAB/DAEVS/SVS/MS)          | Vagner Fonseca, et al.                                                                                                           |
| EPI_ISL_1182604                                                    | Laboratório Central do Estado do Paraná                   | Coordenação Geral de Laboratórios de Saúde Pública (CGLAB/DAEVS/SVS/MS)          | Vagner Fonseca, et al.                                                                                                           |
| EPI_ISL_1182605, EPI_ISL_1182606                                   | Laboratório Central de Saúde Pública do Rio Grande do Sul | Coordenação Geral de Laboratórios de Saúde Pública (CGLAB/DAEVS/SVS/MS)          | Vagner Fonseca, et al.                                                                                                           |
| EPI_ISL_1182611, EPI_ISL_1182615                                   | Fundação Ezequiel Dias (FUNED)                            | Coordenação Geral de Laboratórios de Saúde Pública (CGLAB/DAEVS/SVS/MS)          | Vagner Fonseca, et al.                                                                                                           |
| EPI_ISL_1182616                                                    | Laboratório Central de Saúde Pública do Rio Grande do Sul | Coordenação Geral de Laboratórios de Saúde Pública (CGLAB/DAEVS/SVS/MS)          | Vagner Fonseca, et al.                                                                                                           |
| EPI_ISL_1182617                                                    | Laboratório Central do Estado do Paraná                   | Coordenação Geral de Laboratórios de Saúde Pública (CGLAB/DAEVS/SVS/MS)          | Vagner Fonseca, et al.                                                                                                           |
| EPI_ISL_1182618                                                    | Fundação Ezequiel Dias (FUNED)                            | Coordenação Geral de Laboratórios de Saúde Pública (CGLAB/DAEVS/SVS/MS)          | Vagner Fonseca, et al.                                                                                                           |
| EPI_ISL_1182619, EPI_ISL_1182620                                   | Laboratório Central de Saúde Pública do Rio Grande do Sul | Coordenação Geral de Laboratórios de Saúde Pública (CGLAB/DAEVS/SVS/MS)          | Vagner Fonseca, et al.                                                                                                           |
| EPI_ISL_1182622                                                    | Laboratório Central do Estado do Paraná                   | Coordenação Geral de Laboratórios de Saúde Pública (CGLAB/DAEVS/SVS/MS)          | Vagner Fonseca, et al.                                                                                                           |
| EPI_ISL_1182625                                                    | Fundação Ezequiel Dias (FUNED)                            | Coordenação Geral de Laboratórios de Saúde Pública (CGLAB/DAEVS/SVS/MS)          | Vagner Fonseca, et al.                                                                                                           |
| EPI_ISL_1196290, EPI_ISL_1196292, EPI_ISL_1196294                  | LACEN do Distrito Federal                                 | Instituto Adolfo Lutz, Interdisciplinary Procedures Center, Strategic Laboratory | Claudio Tavares Sacchi, Claudia Regina Gonçalves, Erica Valessa Ramos Gomes, Karoline Rodrigues Campos, Caio Vinicius Dias Lopes |
| EPI_ISL_1196295                                                    | UBS Otacilio Firmino Lopes                                | Instituto Adolfo Lutz, Interdisciplinary Procedures Center, Strategic Laboratory | Claudio Tavares Sacchi, Claudia Regina Gonçalves, Erica Valessa Ramos Gomes, Karoline Rodrigues Campos, Caio Vinicius Dias Lopes |
| EPI_ISL_1196300, EPI_ISL_1196302                                   | IAL Regional de Marília                                   | Instituto Adolfo Lutz, Interdisciplinary Procedures Center, Strategic Laboratory | Claudio Tavares Sacchi, Claudia Regina Gonçalves, Erica Valessa Ramos Gomes, Karoline Rodrigues Campos, Caio Vinicius Dias Lopes |
| EPI_ISL_1201885, EPI_ISL_1201887                                   | Aeroporto Internacional de Guarulhos                      | Instituto Adolfo Lutz, Interdisciplinary Procedures Center, Strategic Laboratory | Claudio Tavares Sacchi, Claudia Regina Gonçalves, Erica Valessa Ramos Gomes, Karoline Rodrigues Campos, Caio Vinicius Dias Lopes |
| EPI_ISL_1201890, EPI_ISL_1201891, EPI_ISL_1201892                  | IAL Regional de Marília                                   | Instituto Adolfo Lutz, Interdisciplinary Procedures Center, Strategic Laboratory | Claudio Tavares Sacchi, Claudia Regina Gonçalves, Erica Valessa Ramos Gomes, Karoline Rodrigues Campos, Caio Vinicius Dias Lopes |



|                                                                                                                                                                                           |           |                                                                           |                                                                                  |                                                                                                                                                                                                                                                                                                                                                                                                                                                                                                                                                                          |
|-------------------------------------------------------------------------------------------------------------------------------------------------------------------------------------------|-----------|---------------------------------------------------------------------------|----------------------------------------------------------------------------------|--------------------------------------------------------------------------------------------------------------------------------------------------------------------------------------------------------------------------------------------------------------------------------------------------------------------------------------------------------------------------------------------------------------------------------------------------------------------------------------------------------------------------------------------------------------------------|
| EPI_ISL_1213345, EPI_ISL_1213348, EPI_ISL_1213350, EPI_ISL_1213352, EPI_ISL_1213353, EPI_ISL_1213355, EPI_ISL_1213357, EPI_ISL_1213358, EPI_ISL_1213360, EPI_ISL_1213362, EPI_ISL_1213364 | see above | IMT-UFRN/RN                                                               | Bioinformatics Laboratory / LNCC                                                 | Alessandra P Lamarca, Luiz G P de Almeida, Ronaldo da Silva Francisco Jr, Lucymara Fassarella Agnez Lima, Kátia Castanho Scortecci, Vinicius Pietta Perez, Otavio J. Brustolini, Eduardo Sérgio Soares Sousa, Danielle Angst Secco, Angela Maria Guimarães Santos, George Rego Albuquerque, Ana Paula Melo Mariano, Bianca Mendes Maciel, Alexandra L Gerber, Ana Paula de C Guimarães, Paulo Ricardo Nascimento, Francisco Paulo Freire Neto, Sandra Rocha Gadelha, Luís Cristóvão Porto, Eloiza Helena Campana, Selma Maria Bezerra Jeronimo, Ana Tereza R Vasconcelos |
| EPI_ISL_1213365                                                                                                                                                                           |           | LAFEM/UESC                                                                | Bioinformatics Laboratory / LNCC                                                 | Alessandra P Lamarca, Luiz G P de Almeida, Ronaldo da Silva Francisco Jr, Lucymara Fassarella Agnez Lima, Kátia Castanho Scortecci, Vinicius Pietta Perez, Otavio J. Brustolini, Eduardo Sérgio Soares Sousa, Danielle Angst Secco, Angela Maria Guimarães Santos, George Rego Albuquerque, Ana Paula Melo Mariano, Bianca Mendes Maciel, Alexandra L Gerber, Ana Paula de C Guimarães, Paulo Ricardo Nascimento, Francisco Paulo Freire Neto, Sandra Rocha Gadelha, Luís Cristóvão Porto, Eloiza Helena Campana, Selma Maria Bezerra Jeronimo, Ana Tereza R Vasconcelos |
| EPI_ISL_1213367, EPI_ISL_1213369, EPI_ISL_1213370                                                                                                                                         |           | LBM/UFPB                                                                  | Bioinformatics Laboratory / LNCC                                                 | Alessandra P Lamarca, Luiz G P de Almeida, Ronaldo da Silva Francisco Jr, Lucymara Fassarella Agnez Lima, Kátia Castanho Scortecci, Vinicius Pietta Perez, Otavio J. Brustolini, Eduardo Sérgio Soares Sousa, Danielle Angst Secco, Angela Maria Guimarães Santos, George Rego Albuquerque, Ana Paula Melo Mariano, Bianca Mendes Maciel, Alexandra L Gerber, Ana Paula de C Guimarães, Paulo Ricardo Nascimento, Francisco Paulo Freire Neto, Sandra Rocha Gadelha, Luís Cristóvão Porto, Eloiza Helena Campana, Selma Maria Bezerra Jeronimo, Ana Tereza R Vasconcelos |
| EPI_ISL_1213372, EPI_ISL_1213374, EPI_ISL_1213376, EPI_ISL_1213378, EPI_ISL_1213379, EPI_ISL_1213382                                                                                      |           | Laboratório HLA/UERJ                                                      | Bioinformatics Laboratory / LNCC                                                 | Alessandra P Lamarca, Luiz G P de Almeida, Ronaldo da Silva Francisco Jr, Lucymara Fassarella Agnez Lima, Kátia Castanho Scortecci, Vinicius Pietta Perez, Otavio J. Brustolini, Eduardo Sérgio Soares Sousa, Danielle Angst Secco, Angela Maria Guimarães Santos, George Rego Albuquerque, Ana Paula Melo Mariano, Bianca Mendes Maciel, Alexandra L Gerber, Ana Paula de C Guimarães, Paulo Ricardo Nascimento, Francisco Paulo Freire Neto, Sandra Rocha Gadelha, Luís Cristóvão Porto, Eloiza Helena Campana, Selma Maria Bezerra Jeronimo, Ana Tereza R Vasconcelos |
| EPI_ISL_1213386                                                                                                                                                                           |           | LAFEM/UESC                                                                | Bioinformatics Laboratory / LNCC                                                 | Alessandra P Lamarca, Luiz G P de Almeida, Ronaldo da Silva Francisco Jr, Lucymara Fassarella Agnez Lima, Kátia Castanho Scortecci, Vinicius Pietta Perez, Otavio J. Brustolini, Eduardo Sérgio Soares Sousa, Danielle Angst Secco, Angela Maria Guimarães Santos, George Rego Albuquerque, Ana Paula Melo Mariano, Bianca Mendes Maciel, Alexandra L Gerber, Ana Paula de C Guimarães, Paulo Ricardo Nascimento, Francisco Paulo Freire Neto, Sandra Rocha Gadelha, Luís Cristóvão Porto, Eloiza Helena Campana, Selma Maria Bezerra Jeronimo, Ana Tereza R Vasconcelos |
| EPI_ISL_1213388                                                                                                                                                                           |           | LBM/UFPB                                                                  | Bioinformatics Laboratory / LNCC                                                 | Alessandra P Lamarca, Luiz G P de Almeida, Ronaldo da Silva Francisco Jr, Lucymara Fassarella Agnez Lima, Kátia Castanho Scortecci, Vinicius Pietta Perez, Otavio J. Brustolini, Eduardo Sérgio Soares Sousa, Danielle Angst Secco, Angela Maria Guimarães Santos, George Rego Albuquerque, Ana Paula Melo Mariano, Bianca Mendes Maciel, Alexandra L Gerber, Ana Paula de C Guimarães, Paulo Ricardo Nascimento, Francisco Paulo Freire Neto, Sandra Rocha Gadelha, Luís Cristóvão Porto, Eloiza Helena Campana, Selma Maria Bezerra Jeronimo, Ana Tereza R Vasconcelos |
| EPI_ISL_1213390                                                                                                                                                                           |           | LAFEM/UESC                                                                | Bioinformatics Laboratory / LNCC                                                 | Alessandra P Lamarca, Luiz G P de Almeida, Ronaldo da Silva Francisco Jr, Lucymara Fassarella Agnez Lima, Kátia Castanho Scortecci, Vinicius Pietta Perez, Otavio J. Brustolini, Eduardo Sérgio Soares Sousa, Danielle Angst Secco, Angela Maria Guimarães Santos, George Rego Albuquerque, Ana Paula Melo Mariano, Bianca Mendes Maciel, Alexandra L Gerber, Ana Paula de C Guimarães, Paulo Ricardo Nascimento, Francisco Paulo Freire Neto, Sandra Rocha Gadelha, Luís Cristóvão Porto, Eloiza Helena Campana, Selma Maria Bezerra Jeronimo, Ana Tereza R Vasconcelos |
| EPI_ISL_1213392                                                                                                                                                                           |           | LBM/UFPB                                                                  | Bioinformatics Laboratory / LNCC                                                 | Alessandra P Lamarca, Luiz G P de Almeida, Ronaldo da Silva Francisco Jr, Lucymara Fassarella Agnez Lima, Kátia Castanho Scortecci, Vinicius Pietta Perez, Otavio J. Brustolini, Eduardo Sérgio Soares Sousa, Danielle Angst Secco, Angela Maria Guimarães Santos, George Rego Albuquerque, Ana Paula Melo Mariano, Bianca Mendes Maciel, Alexandra L Gerber, Ana Paula de C Guimarães, Paulo Ricardo Nascimento, Francisco Paulo Freire Neto, Sandra Rocha Gadelha, Luís Cristóvão Porto, Eloiza Helena Campana, Selma Maria Bezerra Jeronimo, Ana Tereza R Vasconcelos |
| EPI_ISL_1213393, EPI_ISL_1213395                                                                                                                                                          |           | Laboratório HLA/UERJ                                                      | Bioinformatics Laboratory / LNCC                                                 | Alessandra P Lamarca, Luiz G P de Almeida, Ronaldo da Silva Francisco Jr, Lucymara Fassarella Agnez Lima, Kátia Castanho Scortecci, Vinicius Pietta Perez, Otavio J. Brustolini, Eduardo Sérgio Soares Sousa, Danielle Angst Secco, Angela Maria Guimarães Santos, George Rego Albuquerque, Ana Paula Melo Mariano, Bianca Mendes Maciel, Alexandra L Gerber, Ana Paula de C Guimarães, Paulo Ricardo Nascimento, Francisco Paulo Freire Neto, Sandra Rocha Gadelha, Luís Cristóvão Porto, Eloiza Helena Campana, Selma Maria Bezerra Jeronimo, Ana Tereza R Vasconcelos |
| EPI_ISL_1213399, EPI_ISL_1213402                                                                                                                                                          |           | LAFEM/UESC                                                                | Bioinformatics Laboratory / LNCC                                                 | Alessandra P Lamarca, Luiz G P de Almeida, Ronaldo da Silva Francisco Jr, Lucymara Fassarella Agnez Lima, Kátia Castanho Scortecci, Vinicius Pietta Perez, Otavio J. Brustolini, Eduardo Sérgio Soares Sousa, Danielle Angst Secco, Angela Maria Guimarães Santos, George Rego Albuquerque, Ana Paula Melo Mariano, Bianca Mendes Maciel, Alexandra L Gerber, Ana Paula de C Guimarães, Paulo Ricardo Nascimento, Francisco Paulo Freire Neto, Sandra Rocha Gadelha, Luís Cristóvão Porto, Eloiza Helena Campana, Selma Maria Bezerra Jeronimo, Ana Tereza R Vasconcelos |
| EPI_ISL_1213404, EPI_ISL_1213406                                                                                                                                                          |           | LBM/UFPB                                                                  | Bioinformatics Laboratory / LNCC                                                 | Alessandra P Lamarca, Luiz G P de Almeida, Ronaldo da Silva Francisco Jr, Lucymara Fassarella Agnez Lima, Kátia Castanho Scortecci, Vinicius Pietta Perez, Otavio J. Brustolini, Eduardo Sérgio Soares Sousa, Danielle Angst Secco, Angela Maria Guimarães Santos, George Rego Albuquerque, Ana Paula Melo Mariano, Bianca Mendes Maciel, Alexandra L Gerber, Ana Paula de C Guimarães, Paulo Ricardo Nascimento, Francisco Paulo Freire Neto, Sandra Rocha Gadelha, Luís Cristóvão Porto, Eloiza Helena Campana, Selma Maria Bezerra Jeronimo, Ana Tereza R Vasconcelos |
| EPI_ISL_1213408, EPI_ISL_1213410                                                                                                                                                          |           | Laboratório HLA/UERJ                                                      | Bioinformatics Laboratory / LNCC                                                 | Alessandra P Lamarca, Luiz G P de Almeida, Ronaldo da Silva Francisco Jr, Lucymara Fassarella Agnez Lima, Kátia Castanho Scortecci, Vinicius Pietta Perez, Otavio J. Brustolini, Eduardo Sérgio Soares Sousa, Danielle Angst Secco, Angela Maria Guimarães Santos, George Rego Albuquerque, Ana Paula Melo Mariano, Bianca Mendes Maciel, Alexandra L Gerber, Ana Paula de C Guimarães, Paulo Ricardo Nascimento, Francisco Paulo Freire Neto, Sandra Rocha Gadelha, Luís Cristóvão Porto, Eloiza Helena Campana, Selma Maria Bezerra Jeronimo, Ana Tereza R Vasconcelos |
| EPI_ISL_1213411, EPI_ISL_1213413, EPI_ISL_1213415                                                                                                                                         |           | LAFEM/UESC                                                                | Bioinformatics Laboratory / LNCC                                                 | Alessandra P Lamarca, Luiz G P de Almeida, Ronaldo da Silva Francisco Jr, Lucymara Fassarella Agnez Lima, Kátia Castanho Scortecci, Vinicius Pietta Perez, Otavio J. Brustolini, Eduardo Sérgio Soares Sousa, Danielle Angst Secco, Angela Maria Guimarães Santos, George Rego Albuquerque, Ana Paula Melo Mariano, Bianca Mendes Maciel, Alexandra L Gerber, Ana Paula de C Guimarães, Paulo Ricardo Nascimento, Francisco Paulo Freire Neto, Sandra Rocha Gadelha, Luís Cristóvão Porto, Eloiza Helena Campana, Selma Maria Bezerra Jeronimo, Ana Tereza R Vasconcelos |
| EPI_ISL_1213417, EPI_ISL_1213418, EPI_ISL_1213420, EPI_ISL_1213422, EPI_ISL_1213424, EPI_ISL_1213425                                                                                      |           | Laboratório HLA/UERJ                                                      | Bioinformatics Laboratory / LNCC                                                 | Alessandra P Lamarca, Luiz G P de Almeida, Ronaldo da Silva Francisco Jr, Lucymara Fassarella Agnez Lima, Kátia Castanho Scortecci, Vinicius Pietta Perez, Otavio J. Brustolini, Eduardo Sérgio Soares Sousa, Danielle Angst Secco, Angela Maria Guimarães Santos, George Rego Albuquerque, Ana Paula Melo Mariano, Bianca Mendes Maciel, Alexandra L Gerber, Ana Paula de C Guimarães, Paulo Ricardo Nascimento, Francisco Paulo Freire Neto, Sandra Rocha Gadelha, Luís Cristóvão Porto, Eloiza Helena Campana, Selma Maria Bezerra Jeronimo, Ana Tereza R Vasconcelos |
| EPI_ISL_1213427, EPI_ISL_1213431, EPI_ISL_1213436, EPI_ISL_1213438, EPI_ISL_1213439, EPI_ISL_1213441, EPI_ISL_1213446, EPI_ISL_1213449, EPI_ISL_1213451, EPI_ISL_1213456                  |           | LBM/UFPB                                                                  | Bioinformatics Laboratory / LNCC                                                 | Alessandra P Lamarca, Luiz G P de Almeida, Ronaldo da Silva Francisco Jr, Lucymara Fassarella Agnez Lima, Kátia Castanho Scortecci, Vinicius Pietta Perez, Otavio J. Brustolini, Eduardo Sérgio Soares Sousa, Danielle Angst Secco, Angela Maria Guimarães Santos, George Rego Albuquerque, Ana Paula Melo Mariano, Bianca Mendes Maciel, Alexandra L Gerber, Ana Paula de C Guimarães, Paulo Ricardo Nascimento, Francisco Paulo Freire Neto, Sandra Rocha Gadelha, Luís Cristóvão Porto, Eloiza Helena Campana, Selma Maria Bezerra Jeronimo, Ana Tereza R Vasconcelos |
| EPI_ISL_1219023, EPI_ISL_1219024, EPI_ISL_1219026                                                                                                                                         |           | IAL Regional de Sorocaba                                                  | Instituto Adolfo Lutz, Interdisciplinary Procedures Center, Strategic Laboratory | Claudio Tavares Sacchi, Claudia Regina Gonçalves, Erica Valessa Ramos Gomes, Karoline Rodrigues Campos, Caio Vinicius Dias Lopes                                                                                                                                                                                                                                                                                                                                                                                                                                         |
| EPI_ISL_1219027                                                                                                                                                                           |           | IAL Regional de Presidente Prudente                                       | Instituto Adolfo Lutz, Interdisciplinary Procedures Center, Strategic Laboratory | Claudio Tavares Sacchi, Claudia Regina Gonçalves, Erica Valessa Ramos Gomes, Karoline Rodrigues Campos, Caio Vinicius Dias Lopes                                                                                                                                                                                                                                                                                                                                                                                                                                         |
| EPI_ISL_1219031, EPI_ISL_1219034, EPI_ISL_1219035                                                                                                                                         |           | Aeroporto Internacional de Guarulhos                                      | Instituto Adolfo Lutz, Interdisciplinary Procedures Center, Strategic Laboratory | Claudio Tavares Sacchi, Claudia Regina Gonçalves, Erica Valessa Ramos Gomes, Karoline Rodrigues Campos, Caio Vinicius Dias Lopes                                                                                                                                                                                                                                                                                                                                                                                                                                         |
| EPI_ISL_1219037                                                                                                                                                                           |           | IAL Regional de Presidente Prudente                                       | Instituto Adolfo Lutz, Interdisciplinary Procedures Center, Strategic Laboratory | Claudio Tavares Sacchi, Claudia Regina Gonçalves, Erica Valessa Ramos Gomes, Karoline Rodrigues Campos, Caio Vinicius Dias Lopes                                                                                                                                                                                                                                                                                                                                                                                                                                         |
| EPI_ISL_1219137                                                                                                                                                                           |           | Laboratorio Central de Saude Publica do Estado de Minas Gerais (LACEN-MG) | Laboratory of Respiratory Viruses and Measles, Oswaldo Cruz Institute, FIOCRUZ   | Paola Resende, Luciana Appolinario, Fernando Motta, Anna Carolina Paixao, Ana Carolina Mendonca, Alice Sampaio Rocha, Renata Serrano Lopes, Felipe Iani, Marilda Siqueira on behalf of the Fiocruz COVID-19 Genomic Surveillance Network                                                                                                                                                                                                                                                                                                                                 |
| EPI_ISL_1239112, EPI_ISL_1239113                                                                                                                                                          |           | Laboratório Central de Saúde Pública Noel Nutels                          | Coordenação Geral de Laboratórios de Saúde Pública (CGLAB)                       | Vagner Fonseca et al,                                                                                                                                                                                                                                                                                                                                                                                                                                                                                                                                                    |
| EPI_ISL_1239114, EPI_ISL_1239115, EPI_ISL_1239120, EPI_ISL_1239122,                                                                                                                       |           | Laboratório Central de Saúde Pública do Espírito Santo                    | Coordenação Geral de Laboratórios de Saúde Pública (CGLAB)                       | Vagner Fonseca et al,                                                                                                                                                                                                                                                                                                                                                                                                                                                                                                                                                    |

|                                                                                                                                                                                                                                              |                                                                                |                                                                                  |                                                                                                                                                                                                            |                                                                                                                                                                                                                                                                                                                                                                                                                                                                                                                                                                                    |
|----------------------------------------------------------------------------------------------------------------------------------------------------------------------------------------------------------------------------------------------|--------------------------------------------------------------------------------|----------------------------------------------------------------------------------|------------------------------------------------------------------------------------------------------------------------------------------------------------------------------------------------------------|------------------------------------------------------------------------------------------------------------------------------------------------------------------------------------------------------------------------------------------------------------------------------------------------------------------------------------------------------------------------------------------------------------------------------------------------------------------------------------------------------------------------------------------------------------------------------------|
| EPI_ISL_1239123                                                                                                                                                                                                                              |                                                                                |                                                                                  |                                                                                                                                                                                                            |                                                                                                                                                                                                                                                                                                                                                                                                                                                                                                                                                                                    |
| EPI_ISL_1239124                                                                                                                                                                                                                              | Fundação Ezequiel Dias                                                         | Coordenação Geral de Laboratórios de Saúde Pública (CGLAB)                       |                                                                                                                                                                                                            | Vagner Fonseca et al,                                                                                                                                                                                                                                                                                                                                                                                                                                                                                                                                                              |
| EPI_ISL_1239125, EPI_ISL_1239126, EPI_ISL_1239128, EPI_ISL_1239129, EPI_ISL_1239130, EPI_ISL_1239131, EPI_ISL_1239132, EPI_ISL_1239133, EPI_ISL_1239135, EPI_ISL_1239136                                                                     | Laboratório Central de Saúde Pública do Espírito Santo                         | Coordenação Geral de Laboratórios de Saúde Pública (CGLAB)                       |                                                                                                                                                                                                            | Vagner Fonseca et al,                                                                                                                                                                                                                                                                                                                                                                                                                                                                                                                                                              |
| EPI_ISL_1239139                                                                                                                                                                                                                              | Fundação Ezequiel Dias                                                         | Coordenação Geral de Laboratórios de Saúde Pública (CGLAB)                       |                                                                                                                                                                                                            | Vagner Fonseca et al,                                                                                                                                                                                                                                                                                                                                                                                                                                                                                                                                                              |
| EPI_ISL_1240639, EPI_ISL_1240640, EPI_ISL_1240641                                                                                                                                                                                            | Laboratório Central de Saúde Pública do Espírito Santo                         | Coordenação Geral de Laboratórios de Saúde Pública (CGLAB)                       |                                                                                                                                                                                                            | Vagner Fonseca et al.                                                                                                                                                                                                                                                                                                                                                                                                                                                                                                                                                              |
| EPI_ISL_1261696                                                                                                                                                                                                                              | LACEN - Laboratório Central de Saúde Pública do Amapá                          | Evandro Chagas Institute                                                         | Santos, M.C.; Silva, A.M.; Junior, W.D.C.; Barbagelata, L.S.; Ferreira, J.A.; Sousa, E.M.A.; da Silva, P.S.; Pinheiro, K.C.; L.C.; Sousa Junior, E.C.                                                      |                                                                                                                                                                                                                                                                                                                                                                                                                                                                                                                                                                                    |
| EPI_ISL_1261699                                                                                                                                                                                                                              | LACEN - Laboratório Central de Saúde Pública de Pernambuco                     | Evandro Chagas Institute                                                         | Santos, M.C.; Silva, A.M.; Junior, W.D.C.; Barbagelata, L.S.; Ferreira, J.A.; Sousa, E.M.A.; da Silva, P.S.; Pinheiro, K.C.; L.C.; Sousa Junior, E.C.                                                      |                                                                                                                                                                                                                                                                                                                                                                                                                                                                                                                                                                                    |
| EPI_ISL_1272236                                                                                                                                                                                                                              | Universidade Federal do Norte do Tocantins (UFNT)                              | Laboratório de Bioinformática e Biotecnologia (Labinftec/UFT)                    | Ueric José Borges de Souza, Fabrício Souza Campos, Raíssa Nunes dos Santos, José Carlos Ribeiro Júnior, Rogério Fernandes Carvalho, Monike da Silva Oliveira, Bergmann Morais Ribeiro, Fernando Lucas Melo |                                                                                                                                                                                                                                                                                                                                                                                                                                                                                                                                                                                    |
| EPI_ISL_1293058, EPI_ISL_1293060, EPI_ISL_1293061, EPI_ISL_1293065, EPI_ISL_1293068, EPI_ISL_1293071, EPI_ISL_1293073, EPI_ISL_1293076, EPI_ISL_1293078, EPI_ISL_1293079                                                                     | IAL Regional de Sorocaba                                                       | Instituto Adolfo Lutz, Interdisciplinary Procedures Center, Strategic Laboratory |                                                                                                                                                                                                            | Claudio Tavares Sacchi, Claudia Regina Gonçalves, Erica Valessa Ramos Gomes, Karoline Rodrigues Campos, Caio Vinicius Dias Lopes                                                                                                                                                                                                                                                                                                                                                                                                                                                   |
| EPI_ISL_1303505                                                                                                                                                                                                                              | LACEN de Rondonia                                                              | Instituto Adolfo Lutz, Interdisciplinary Procedures Center, Strategic Laboratory |                                                                                                                                                                                                            | Claudio Tavares Sacchi, Claudia Regina Gonçalves, Erica Valessa Ramos Gomes, Karoline Rodrigues Campos, Caio Vinicius Dias Lopes                                                                                                                                                                                                                                                                                                                                                                                                                                                   |
| EPI_ISL_1303507                                                                                                                                                                                                                              | LACEN do Distrito Federal                                                      | Instituto Adolfo Lutz, Interdisciplinary Procedures Center, Strategic Laboratory |                                                                                                                                                                                                            | Claudio Tavares Sacchi, Claudia Regina Gonçalves, Erica Valessa Ramos Gomes, Karoline Rodrigues Campos, Caio Vinicius Dias Lopes                                                                                                                                                                                                                                                                                                                                                                                                                                                   |
| EPI_ISL_1303511, EPI_ISL_1303516                                                                                                                                                                                                             | LACEN do Estado de Goiás                                                       | Instituto Adolfo Lutz, Interdisciplinary Procedures Center, Strategic Laboratory |                                                                                                                                                                                                            | Claudio Tavares Sacchi, Claudia Regina Gonçalves, Erica Valessa Ramos Gomes, Karoline Rodrigues Campos, Caio Vinicius Dias Lopes                                                                                                                                                                                                                                                                                                                                                                                                                                                   |
| EPI_ISL_1303518, EPI_ISL_1303519, EPI_ISL_1303523, EPI_ISL_1303524, EPI_ISL_1303526, EPI_ISL_1303530, EPI_ISL_1303531, EPI_ISL_1303532, EPI_ISL_1303533, EPI_ISL_1303534                                                                     | IAL Regional de São Jose do Rio Preto                                          | Instituto Adolfo Lutz, Interdisciplinary Procedures Center, Strategic Laboratory |                                                                                                                                                                                                            | Claudio Tavares Sacchi, Claudia Regina Gonçalves, Erica Valessa Ramos Gomes, Karoline Rodrigues Campos, Caio Vinicius Dias Lopes                                                                                                                                                                                                                                                                                                                                                                                                                                                   |
| EPI_ISL_1303535                                                                                                                                                                                                                              | Hospital Heliopolis                                                            | Instituto Adolfo Lutz, Interdisciplinary Procedures Center, Strategic Laboratory |                                                                                                                                                                                                            | Claudio Tavares Sacchi, Claudia Regina Gonçalves, Erica Valessa Ramos Gomes, Karoline Rodrigues Campos, Caio Vinicius Dias Lopes                                                                                                                                                                                                                                                                                                                                                                                                                                                   |
| EPI_ISL_1303538                                                                                                                                                                                                                              | Hospital Presidente                                                            | Instituto Adolfo Lutz, Interdisciplinary Procedures Center, Strategic Laboratory |                                                                                                                                                                                                            | Claudio Tavares Sacchi, Claudia Regina Gonçalves, Erica Valessa Ramos Gomes, Karoline Rodrigues Campos, Caio Vinicius Dias Lopes                                                                                                                                                                                                                                                                                                                                                                                                                                                   |
| EPI_ISL_1303540                                                                                                                                                                                                                              | Hospital Municipal Cidade Tiradentes Carmen Prudente                           | Instituto Adolfo Lutz, Interdisciplinary Procedures Center, Strategic Laboratory |                                                                                                                                                                                                            | Claudio Tavares Sacchi, Claudia Regina Gonçalves, Erica Valessa Ramos Gomes, Karoline Rodrigues Campos, Caio Vinicius Dias Lopes                                                                                                                                                                                                                                                                                                                                                                                                                                                   |
| EPI_ISL_1324142, EPI_ISL_1324145                                                                                                                                                                                                             | UW Virology Lab                                                                | UW Virology Lab                                                                  |                                                                                                                                                                                                            | Pavitra Roychoudhury, Hong Xie, Lasata Shrestha, Shah Mohamed Bakhsh, Michelle Lin, Margaret Mills, Noah Baker, Sean Ellis, Saraswathi Sathees, Meei-Li Huang, Keith R Jerome, Alexander Greninger                                                                                                                                                                                                                                                                                                                                                                                 |
| EPI_ISL_1358291, EPI_ISL_1358294, EPI_ISL_1358295, EPI_ISL_1358298, EPI_ISL_1358299                                                                                                                                                          | IAL Regional de Santo Andre                                                    | Instituto Adolfo Lutz, Interdisciplinary Procedures Center, Strategic Laboratory |                                                                                                                                                                                                            | Claudio Tavares Sacchi, Claudia Regina Gonçalves, Erica Valessa Ramos Gomes, Karoline Rodrigues Campos, Caio Vinicius Dias Lopes                                                                                                                                                                                                                                                                                                                                                                                                                                                   |
| EPI_ISL_1358303                                                                                                                                                                                                                              | Lacem de Tocantins                                                             | Instituto Adolfo Lutz, Interdisciplinary Procedures Center, Strategic Laboratory |                                                                                                                                                                                                            | Claudio Tavares Sacchi, Claudia Regina Gonçalves, Erica Valessa Ramos Gomes, Karoline Rodrigues Campos, Caio Vinicius Dias Lopes                                                                                                                                                                                                                                                                                                                                                                                                                                                   |
| EPI_ISL_1358306, EPI_ISL_1358310, EPI_ISL_1358312, EPI_ISL_1358313, EPI_ISL_1358315, EPI_ISL_1358316, EPI_ISL_1358317                                                                                                                        | LACEN do Mato Grosso do Sul                                                    | Instituto Adolfo Lutz, Interdisciplinary Procedures Center, Strategic Laboratory |                                                                                                                                                                                                            | Claudio Tavares Sacchi, Claudia Regina Gonçalves, Erica Valessa Ramos Gomes, Karoline Rodrigues Campos, Caio Vinicius Dias Lopes                                                                                                                                                                                                                                                                                                                                                                                                                                                   |
| EPI_ISL_1381043, EPI_ISL_1381051, EPI_ISL_1381053, EPI_ISL_1381054, EPI_ISL_1381058                                                                                                                                                          | IAL Regional de Santo Andre                                                    | Instituto Adolfo Lutz, Interdisciplinary Procedures Center, Strategic Laboratory |                                                                                                                                                                                                            | Claudio Tavares Sacchi, Claudia Regina Gonçalves, Erica Valessa Ramos Gomes, Karoline Rodrigues Campos, Caio Vinicius Dias Lopes                                                                                                                                                                                                                                                                                                                                                                                                                                                   |
| EPI_ISL_1381066                                                                                                                                                                                                                              | LACEN do Mato Grosso do Sul                                                    | Instituto Adolfo Lutz, Interdisciplinary Procedures Center, Strategic Laboratory |                                                                                                                                                                                                            | Claudio Tavares Sacchi, Claudia Regina Gonçalves, Erica Valessa Ramos Gomes, Karoline Rodrigues Campos, Caio Vinicius Dias Lopes                                                                                                                                                                                                                                                                                                                                                                                                                                                   |
| EPI_ISL_1402429                                                                                                                                                                                                                              | Laboratory of Respiratory Viruses and Measles, Oswaldo Cruz Institute, FIOCRUZ | Laboratory of Respiratory Viruses and Measles, Oswaldo Cruz Institute, FIOCRUZ   |                                                                                                                                                                                                            | Paola Resende, Alex Pauvolid-Correa, Mia Ferreira Araujo, Ana Beatriz Machado Lima, Luciana Appolinario, Fernando Motta, Anna Carolina Paixao, Ana Carolina Mendonca, Alice Sampaio Rocha, Renata Serrano Lopes, Marilda Siqueira on behalf of the Fiocruz COVID-19 Genomic Surveillance Network                                                                                                                                                                                                                                                                                   |
| EPI_ISL_1445243, EPI_ISL_1445248                                                                                                                                                                                                             | SECAO CENTRO DE DIAGNOSTICO SECEDI                                             | Instituto Butantan / Mendelics                                                   |                                                                                                                                                                                                            | Dimas Tadeu Covas, Sandra Coccuzzo Sampaio, Maria Carolina Elias, José Salvatore Leister Patané, Vincent Louis Viala, Antonio Jorge Martins, Ricardo Haddad, Claudia Renata dos Santos Barros, Elaine Cristina Marqueze, Raul Machado Neto, Debora Botequiu Moretti, Bibiana Santos, João Paulo Kitajima, Erika Freitas, David Schlesinger, Simone Kashima, Evandra Strazza Rodrigues, Svetoslav Nanev Slavov, Elaine Vieira dos Santos, Rafael dos Santos Bezerra, Luiz Carlos Junior de Alcantara, Marta Giovanetti, Vagner Fonseca, Flavia Aburjaile, Rodrigo Tocantins Calado. |
| EPI_ISL_1465248, EPI_ISL_1465252, EPI_ISL_1465253, EPI_ISL_1465254, EPI_ISL_1465255, EPI_ISL_1465257, EPI_ISL_1465258, EPI_ISL_1465262, EPI_ISL_1465264, EPI_ISL_1465265, EPI_ISL_1465270, EPI_ISL_1465271, EPI_ISL_1465273, EPI_ISL_1465275 |                                                                                |                                                                                  |                                                                                                                                                                                                            |                                                                                                                                                                                                                                                                                                                                                                                                                                                                                                                                                                                    |
| see above                                                                                                                                                                                                                                    | Laboratorio Central de Saude Publica do Estado do Maranhao (LACEN-MA)          | Laboratory of Respiratory Viruses and Measles, Oswaldo Cruz Institute, FIOCRUZ   |                                                                                                                                                                                                            | Paola Resende, Luciana Appolinario, Fernando Motta, Anna Carolina Paixao, Ana Carolina Mendonca, Alice Sampaio Rocha, Renata Serrano Lopes, Lidio Gonçalves Lima Neto, Marilda Siqueira on behalf of the Fiocruz COVID-19 Genomic Surveillance Network                                                                                                                                                                                                                                                                                                                             |
| EPI_ISL_1468412                                                                                                                                                                                                                              | Hospital Estadual de Mirandópolis                                              | Instituto Adolfo Lutz, Interdisciplinary Procedures Center, Strategic Laboratory |                                                                                                                                                                                                            | Claudio Tavares Sacchi, Claudia Regina Gonçalves, Erica Valessa Ramos Gomes, Karoline Rodrigues Campos, Caio Vinicius Dias Lopes                                                                                                                                                                                                                                                                                                                                                                                                                                                   |
| EPI_ISL_1468433, EPI_ISL_1468436, EPI_ISL_1468438, EPI_ISL_1468439, EPI_ISL_1468440, EPI_ISL_1468441                                                                                                                                         | LACEN do Mato Grosso do Sul                                                    | Instituto Adolfo Lutz, Interdisciplinary Procedures Center, Strategic Laboratory |                                                                                                                                                                                                            | Claudio Tavares Sacchi, Claudia Regina Gonçalves, Erica Valessa Ramos Gomes, Karoline Rodrigues Campos, Caio Vinicius Dias Lopes                                                                                                                                                                                                                                                                                                                                                                                                                                                   |
| EPI_ISL_1468443                                                                                                                                                                                                                              | Hospital Estadual de Mirandópolis                                              | Instituto Adolfo Lutz, Interdisciplinary Procedures Center, Strategic Laboratory |                                                                                                                                                                                                            | Claudio Tavares Sacchi, Claudia Regina Gonçalves, Erica Valessa Ramos Gomes, Karoline Rodrigues Campos, Caio Vinicius Dias Lopes                                                                                                                                                                                                                                                                                                                                                                                                                                                   |
| EPI_ISL_1468444                                                                                                                                                                                                                              | Secretaria Municipal de Saude de Birigui                                       | Instituto Adolfo Lutz, Interdisciplinary Procedures Center, Strategic Laboratory |                                                                                                                                                                                                            | Claudio Tavares Sacchi, Claudia Regina Gonçalves, Erica Valessa Ramos Gomes, Karoline Rodrigues Campos, Caio Vinicius Dias Lopes                                                                                                                                                                                                                                                                                                                                                                                                                                                   |

|                                                                                                                                                                                                                                                                                                                                                                                                                                                                                                             |                                                           |                                                                                                                                                                                                                                                                                                                                                                                                                                                            |                                                                                                                                      |
|-------------------------------------------------------------------------------------------------------------------------------------------------------------------------------------------------------------------------------------------------------------------------------------------------------------------------------------------------------------------------------------------------------------------------------------------------------------------------------------------------------------|-----------------------------------------------------------|------------------------------------------------------------------------------------------------------------------------------------------------------------------------------------------------------------------------------------------------------------------------------------------------------------------------------------------------------------------------------------------------------------------------------------------------------------|--------------------------------------------------------------------------------------------------------------------------------------|
| EPI_ISL_1468445                                                                                                                                                                                                                                                                                                                                                                                                                                                                                             | Santa Casa de Misericórdia de Pereira Barreto             | Instituto Adolfo Lutz, Interdisciplinary Procedures Center, Strategic Laboratory                                                                                                                                                                                                                                                                                                                                                                           | Claudio Tavares Sacchi, Claudia Regina Gonçalves, Erica Valessa Ramos Gomes, Karoline Rodrigues Campos, Caio Vinicius Dias Lopes     |
| EPI_ISL_1468446                                                                                                                                                                                                                                                                                                                                                                                                                                                                                             | Secretaria Municipal de Saude de Birigui                  | Instituto Adolfo Lutz, Interdisciplinary Procedures Center, Strategic Laboratory                                                                                                                                                                                                                                                                                                                                                                           | Claudio Tavares Sacchi, Claudia Regina Gonçalves, Erica Valessa Ramos Gomes, Karoline Rodrigues Campos, Caio Vinicius Dias Lopes     |
| EPI_ISL_1468447                                                                                                                                                                                                                                                                                                                                                                                                                                                                                             | Secretaria Municipal de Saude de Andradina                | Instituto Adolfo Lutz, Interdisciplinary Procedures Center, Strategic Laboratory                                                                                                                                                                                                                                                                                                                                                                           | Claudio Tavares Sacchi, Claudia Regina Gonçalves, Erica Valessa Ramos Gomes, Karoline Rodrigues Campos, Caio Vinicius Dias Lopes     |
| EPI_ISL_1468448                                                                                                                                                                                                                                                                                                                                                                                                                                                                                             | Santa Casa de Birigui                                     | Instituto Adolfo Lutz, Interdisciplinary Procedures Center, Strategic Laboratory                                                                                                                                                                                                                                                                                                                                                                           | Claudio Tavares Sacchi, Claudia Regina Gonçalves, Erica Valessa Ramos Gomes, Karoline Rodrigues Campos, Caio Vinicius Dias Lopes     |
| EPI_ISL_1468450                                                                                                                                                                                                                                                                                                                                                                                                                                                                                             | Santa Casa de Aracatuba Hospital Sagrado Coracao de Jesus | Instituto Adolfo Lutz, Interdisciplinary Procedures Center, Strategic Laboratory                                                                                                                                                                                                                                                                                                                                                                           | Claudio Tavares Sacchi, Claudia Regina Gonçalves, Erica Valessa Ramos Gomes, Karoline Rodrigues Campos, Caio Vinicius Dias Lopes     |
| EPI_ISL_1468451                                                                                                                                                                                                                                                                                                                                                                                                                                                                                             | UBS IV Guararapes                                         | Instituto Adolfo Lutz, Interdisciplinary Procedures Center, Strategic Laboratory                                                                                                                                                                                                                                                                                                                                                                           | Claudio Tavares Sacchi, Claudia Regina Gonçalves, Erica Valessa Ramos Gomes, Karoline Rodrigues Campos, Caio Vinicius Dias Lopes     |
| EPI_ISL_1468452                                                                                                                                                                                                                                                                                                                                                                                                                                                                                             | Centro de Atendimento COVID                               | Instituto Adolfo Lutz, Interdisciplinary Procedures Center, Strategic Laboratory                                                                                                                                                                                                                                                                                                                                                                           | Claudio Tavares Sacchi, Claudia Regina Gonçalves, Erica Valessa Ramos Gomes, Karoline Rodrigues Campos, Caio Vinicius Dias Lopes     |
| EPI_ISL_1468455                                                                                                                                                                                                                                                                                                                                                                                                                                                                                             | UBS 02 Jardim Toselar Birigui                             | Instituto Adolfo Lutz, Interdisciplinary Procedures Center, Strategic Laboratory                                                                                                                                                                                                                                                                                                                                                                           | Claudio Tavares Sacchi, Claudia Regina Gonçalves, Erica Valessa Ramos Gomes, Karoline Rodrigues Campos, Caio Vinicius Dias Lopes     |
| EPI_ISL_1468456, EPI_ISL_1468457                                                                                                                                                                                                                                                                                                                                                                                                                                                                            | UBS Dr Alfredo Dantas de Souza Umuarama                   | Instituto Adolfo Lutz, Interdisciplinary Procedures Center, Strategic Laboratory                                                                                                                                                                                                                                                                                                                                                                           | Claudio Tavares Sacchi, Claudia Regina Gonçalves, Erica Valessa Ramos Gomes, Karoline Rodrigues Campos, Caio Vinicius Dias Lopes     |
| EPI_ISL_1468458                                                                                                                                                                                                                                                                                                                                                                                                                                                                                             | Secretaria Municipal de Saude de Valparaiso SP            | Instituto Adolfo Lutz, Interdisciplinary Procedures Center, Strategic Laboratory                                                                                                                                                                                                                                                                                                                                                                           | Claudio Tavares Sacchi, Claudia Regina Gonçalves, Erica Valessa Ramos Gomes, Karoline Rodrigues Campos, Caio Vinicius Dias Lopes     |
| EPI_ISL_1468460                                                                                                                                                                                                                                                                                                                                                                                                                                                                                             | Santa Casa de Birigui                                     | Instituto Adolfo Lutz, Interdisciplinary Procedures Center, Strategic Laboratory                                                                                                                                                                                                                                                                                                                                                                           | Claudio Tavares Sacchi, Claudia Regina Gonçalves, Erica Valessa Ramos Gomes, Karoline Rodrigues Campos, Caio Vinicius Dias Lopes     |
| EPI_ISL_1468461                                                                                                                                                                                                                                                                                                                                                                                                                                                                                             | Santa Casa de Aracatuba Hospital Sagrado Coracao de Jesus | Instituto Adolfo Lutz, Interdisciplinary Procedures Center, Strategic Laboratory                                                                                                                                                                                                                                                                                                                                                                           | Claudio Tavares Sacchi, Claudia Regina Gonçalves, Erica Valessa Ramos Gomes, Karoline Rodrigues Campos, Caio Vinicius Dias Lopes     |
| EPI_ISL_1468463                                                                                                                                                                                                                                                                                                                                                                                                                                                                                             | Centro de Saude II Matao                                  | Instituto Adolfo Lutz, Interdisciplinary Procedures Center, Strategic Laboratory                                                                                                                                                                                                                                                                                                                                                                           | Claudio Tavares Sacchi, Claudia Regina Gonçalves, Erica Valessa Ramos Gomes, Karoline Rodrigues Campos, Caio Vinicius Dias Lopes     |
| EPI_ISL_1468464, EPI_ISL_1468465                                                                                                                                                                                                                                                                                                                                                                                                                                                                            | Sae servico de Atendimento Especializado                  | Instituto Adolfo Lutz, Interdisciplinary Procedures Center, Strategic Laboratory                                                                                                                                                                                                                                                                                                                                                                           | Claudio Tavares Sacchi, Claudia Regina Gonçalves, Erica Valessa Ramos Gomes, Karoline Rodrigues Campos, Caio Vinicius Dias Lopes     |
| EPI_ISL_1468467                                                                                                                                                                                                                                                                                                                                                                                                                                                                                             | Secretaria Municipal de Saude Descalvado                  | Instituto Adolfo Lutz, Interdisciplinary Procedures Center, Strategic Laboratory                                                                                                                                                                                                                                                                                                                                                                           | Claudio Tavares Sacchi, Claudia Regina Gonçalves, Erica Valessa Ramos Gomes, Karoline Rodrigues Campos, Caio Vinicius Dias Lopes     |
| EPI_ISL_1468468                                                                                                                                                                                                                                                                                                                                                                                                                                                                                             | Secretaria municipal de saude de Itapolis                 | Instituto Adolfo Lutz, Interdisciplinary Procedures Center, Strategic Laboratory                                                                                                                                                                                                                                                                                                                                                                           | Claudio Tavares Sacchi, Claudia Regina Gonçalves, Erica Valessa Ramos Gomes, Karoline Rodrigues Campos, Caio Vinicius Dias Lopes     |
| EPI_ISL_1468472, EPI_ISL_1468473                                                                                                                                                                                                                                                                                                                                                                                                                                                                            | Centro de Saude II Matao                                  | Instituto Adolfo Lutz, Interdisciplinary Procedures Center, Strategic Laboratory                                                                                                                                                                                                                                                                                                                                                                           | Claudio Tavares Sacchi, Claudia Regina Gonçalves, Erica Valessa Ramos Gomes, Karoline Rodrigues Campos, Caio Vinicius Dias Lopes     |
| EPI_ISL_1468474                                                                                                                                                                                                                                                                                                                                                                                                                                                                                             | Sae servico de Atendimento Especializado                  | Instituto Adolfo Lutz, Interdisciplinary Procedures Center, Strategic Laboratory                                                                                                                                                                                                                                                                                                                                                                           | Claudio Tavares Sacchi, Claudia Regina Gonçalves, Erica Valessa Ramos Gomes, Karoline Rodrigues Campos, Caio Vinicius Dias Lopes     |
| EPI_ISL_1469568, EPI_ISL_1469639                                                                                                                                                                                                                                                                                                                                                                                                                                                                            | SECRETARIA MUNICIPAL DE SAUDE DE SAO LEOPOLDO             | Epiciin                                                                                                                                                                                                                                                                                                                                                                                                                                                    | Fernando Hayashi Sant'Anna, Ana Paula Muterle, Janira Prichula, Juliana Comerlato, Carolina Comerlato, Eliana Márcia Da Ros Wendland |
| EPI_ISL_1469678                                                                                                                                                                                                                                                                                                                                                                                                                                                                                             | SECRETARIA MUNICIPAL DE SAUDE DE TRES COROAS              | Epiciin                                                                                                                                                                                                                                                                                                                                                                                                                                                    | Fernando Hayashi Sant'Anna, Ana Paula Muterle, Janira Prichula, Juliana Comerlato, Carolina Comerlato, Eliana Márcia Da Ros Wendland |
| EPI_ISL_1469682                                                                                                                                                                                                                                                                                                                                                                                                                                                                                             | CENTRO DE SERVICOS ESPECIALIZADOS SANTA RITA DE CASSIA    | Epiciin                                                                                                                                                                                                                                                                                                                                                                                                                                                    | Fernando Hayashi Sant'Anna, Ana Paula Muterle, Janira Prichula, Juliana Comerlato, Carolina Comerlato, Eliana Márcia Da Ros Wendland |
| EPI_ISL_1469715                                                                                                                                                                                                                                                                                                                                                                                                                                                                                             | COORDENADORIA GERAL DE VIGILANCIA EM SAUDE                | Epiciin                                                                                                                                                                                                                                                                                                                                                                                                                                                    | Fernando Hayashi Sant'Anna, Ana Paula Muterle, Janira Prichula, Juliana Comerlato, Carolina Comerlato, Eliana Márcia Da Ros Wendland |
| EPI_ISL_1469732                                                                                                                                                                                                                                                                                                                                                                                                                                                                                             | CENTRO DE REFERENCIA EM SINDROMES GRIPAIS                 | Epiciin                                                                                                                                                                                                                                                                                                                                                                                                                                                    | Fernando Hayashi Sant'Anna, Ana Paula Muterle, Janira Prichula, Juliana Comerlato, Carolina Comerlato, Eliana Márcia Da Ros Wendland |
| EPI_ISL_1469743                                                                                                                                                                                                                                                                                                                                                                                                                                                                                             | DIRETORIA DE VIGILANCIA EM SAUDE                          | Epiciin                                                                                                                                                                                                                                                                                                                                                                                                                                                    | Fernando Hayashi Sant'Anna, Ana Paula Muterle, Janira Prichula, Juliana Comerlato, Carolina Comerlato, Eliana Márcia Da Ros Wendland |
| EPI_ISL_1469744                                                                                                                                                                                                                                                                                                                                                                                                                                                                                             | HOSPITAL SAO FRANCISCO DE ASSIS                           | Epiciin                                                                                                                                                                                                                                                                                                                                                                                                                                                    | Fernando Hayashi Sant'Anna, Ana Paula Muterle, Janira Prichula, Juliana Comerlato, Carolina Comerlato, Eliana Márcia Da Ros Wendland |
| EPI_ISL_1469757                                                                                                                                                                                                                                                                                                                                                                                                                                                                                             | Secretaria Municipal de Saúde de São Leopoldo             | Epiciin                                                                                                                                                                                                                                                                                                                                                                                                                                                    | Fernando Hayashi Sant'Anna, Ana Paula Muterle, Janira Prichula, Juliana Comerlato, Carolina Comerlato, Eliana Márcia Da Ros Wendland |
| EPI_ISL_1469782                                                                                                                                                                                                                                                                                                                                                                                                                                                                                             | COORDENADORIA GERAL DE VIGILANCIA EM SAUDE                | Epiciin                                                                                                                                                                                                                                                                                                                                                                                                                                                    | Fernando Hayashi Sant'Anna, Ana Paula Muterle, Janira Prichula, Juliana Comerlato, Carolina Comerlato, Eliana Márcia Da Ros Wendland |
| EPI_ISL_1493572                                                                                                                                                                                                                                                                                                                                                                                                                                                                                             | Centro de Saude II Dr Alcides Facundo Arroyo              | Instituto Adolfo Lutz, Interdisciplinary Procedures Center, Strategic Laboratory                                                                                                                                                                                                                                                                                                                                                                           | Claudio Tavares Sacchi, Claudia Regina Gonçalves, Erica Valessa Ramos Gomes, Karoline Rodrigues Campos, Caio Vinicius Dias Lopes     |
| EPI_ISL_1493584                                                                                                                                                                                                                                                                                                                                                                                                                                                                                             | LACEN do Estado de Rondonia                               | Instituto Adolfo Lutz, Interdisciplinary Procedures Center, Strategic Laboratory                                                                                                                                                                                                                                                                                                                                                                           | Claudio Tavares Sacchi, Claudia Regina Gonçalves, Erica Valessa Ramos Gomes, Karoline Rodrigues Campos, Caio Vinicius Dias Lopes     |
| EPI_ISL_1493585                                                                                                                                                                                                                                                                                                                                                                                                                                                                                             | Unidade de Saude Dr Phebo de Oliveira Roge Ferreira       | Instituto Adolfo Lutz, Interdisciplinary Procedures Center, Strategic Laboratory                                                                                                                                                                                                                                                                                                                                                                           | Claudio Tavares Sacchi, Claudia Regina Gonçalves, Erica Valessa Ramos Gomes, Karoline Rodrigues Campos, Caio Vinicius Dias Lopes     |
| EPI_ISL_1493586                                                                                                                                                                                                                                                                                                                                                                                                                                                                                             | Hospital Sao Marcos da Samamorro Agudo                    | Instituto Adolfo Lutz, Interdisciplinary Procedures Center, Strategic Laboratory                                                                                                                                                                                                                                                                                                                                                                           | Claudio Tavares Sacchi, Claudia Regina Gonçalves, Erica Valessa Ramos Gomes, Karoline Rodrigues Campos, Caio Vinicius Dias Lopes     |
| EPI_ISL_1493587, EPI_ISL_1493588                                                                                                                                                                                                                                                                                                                                                                                                                                                                            | CS III de Patrocinio Paulista                             | Instituto Adolfo Lutz, Interdisciplinary Procedures Center, Strategic Laboratory                                                                                                                                                                                                                                                                                                                                                                           | Claudio Tavares Sacchi, Claudia Regina Gonçalves, Erica Valessa Ramos Gomes, Karoline Rodrigues Campos, Caio Vinicius Dias Lopes     |
| EPI_ISL_1493589                                                                                                                                                                                                                                                                                                                                                                                                                                                                                             | CS II Dr Jose Ferreira Telles                             | Instituto Adolfo Lutz, Interdisciplinary Procedures Center, Strategic Laboratory                                                                                                                                                                                                                                                                                                                                                                           | Claudio Tavares Sacchi, Claudia Regina Gonçalves, Erica Valessa Ramos Gomes, Karoline Rodrigues Campos, Caio Vinicius Dias Lopes     |
| EPI_ISL_1493593                                                                                                                                                                                                                                                                                                                                                                                                                                                                                             | CS II Dr Jahyr de Paula Ribeiro Guara                     | Instituto Adolfo Lutz, Interdisciplinary Procedures Center, Strategic Laboratory                                                                                                                                                                                                                                                                                                                                                                           | Claudio Tavares Sacchi, Claudia Regina Gonçalves, Erica Valessa Ramos Gomes, Karoline Rodrigues Campos, Caio Vinicius Dias Lopes     |
| EPI_ISL_1493594                                                                                                                                                                                                                                                                                                                                                                                                                                                                                             | Unidade de Saude Dr Phebo de Oliveira Roge Ferreira       | Instituto Adolfo Lutz, Interdisciplinary Procedures Center, Strategic Laboratory                                                                                                                                                                                                                                                                                                                                                                           | Claudio Tavares Sacchi, Claudia Regina Gonçalves, Erica Valessa Ramos Gomes, Karoline Rodrigues Campos, Caio Vinicius Dias Lopes     |
| EPI_ISL_1493596, EPI_ISL_1493598, EPI_ISL_1493600                                                                                                                                                                                                                                                                                                                                                                                                                                                           | LACEN do Estado de Rondonia                               | Instituto Adolfo Lutz, Interdisciplinary Procedures Center, Strategic Laboratory                                                                                                                                                                                                                                                                                                                                                                           | Claudio Tavares Sacchi, Claudia Regina Gonçalves, Erica Valessa Ramos Gomes, Karoline Rodrigues Campos, Caio Vinicius Dias Lopes     |
| EPI_ISL_1494960, EPI_ISL_1494963, EPI_ISL_1494964, EPI_ISL_1494965, EPI_ISL_1494966, EPI_ISL_1494967, EPI_ISL_1494968, EPI_ISL_1494969, EPI_ISL_1494971, EPI_ISL_1494975, EPI_ISL_1494976, EPI_ISL_1494980, EPI_ISL_1494981, EPI_ISL_1494983, EPI_ISL_1494985, EPI_ISL_1494988, EPI_ISL_1494990, EPI_ISL_1494991, EPI_ISL_1494992, EPI_ISL_1494995, EPI_ISL_1494996, EPI_ISL_1494997, EPI_ISL_1494999, EPI_ISL_1495002, EPI_ISL_1495006, EPI_ISL_1495008, EPI_ISL_1495034, EPI_ISL_1495041, EPI_ISL_1495042 |                                                           | Filipe Romero Rebello Moreira, Diego Menezes Bonfim, Victor Emmanuel Viana Geddes, Danielle Alves Gomes Zauli, Joice do Prado Silva, Aline Brito de Lima, Frederico Scott Varella Malta, Alessandro Clayton de Souza Ferreira, Victor Cavalcanti Pardini, Daniel Costa Queiroz, Rafael Marques de Souza, Lucylene Miguita Luiz, Paula Luize Camargos Fonseca, Rennan Garcias Moreira, Nuno Rodrigues Faria, Carolina Moreira Voloch, Renan Pedra de Souza, |                                                                                                                                      |
| see above                                                                                                                                                                                                                                                                                                                                                                                                                                                                                                   | Laboratório de Biologia Integrativa                       | Laboratório de Biologia Integrativa                                                                                                                                                                                                                                                                                                                                                                                                                        |                                                                                                                                      |

|                                                                                                                                                                                                                                                                                                                                                                                                                                                                                                                                                                                                                                                                                                                                                                                                |                                                                                                                    |                                                                                                                    |                                                                                                                                                                                                                                                                                                                                                                                                                                                              | Renato Santana Aguiar |
|------------------------------------------------------------------------------------------------------------------------------------------------------------------------------------------------------------------------------------------------------------------------------------------------------------------------------------------------------------------------------------------------------------------------------------------------------------------------------------------------------------------------------------------------------------------------------------------------------------------------------------------------------------------------------------------------------------------------------------------------------------------------------------------------|--------------------------------------------------------------------------------------------------------------------|--------------------------------------------------------------------------------------------------------------------|--------------------------------------------------------------------------------------------------------------------------------------------------------------------------------------------------------------------------------------------------------------------------------------------------------------------------------------------------------------------------------------------------------------------------------------------------------------|-----------------------|
| EPI_ISL_1498823, EPI_ISL_1498824, EPI_ISL_1498825, EPI_ISL_1498919, EPI_ISL_1499203, EPI_ISL_1499298, EPI_ISL_1499299                                                                                                                                                                                                                                                                                                                                                                                                                                                                                                                                                                                                                                                                          | Associação Fundo de Incentivo à Pesquisa (AFIP)                                                                    | Associação Fundo de Incentivo à Pesquisa (AFIP)                                                                    | Priscila Farias Tempaku, Juliana Nogueira Martins Rodrigues, Erika Rodrigues de Oliveira, Debora R. Ramadan, Soraya Sgambatti de Andrade, Sergio Tufik.                                                                                                                                                                                                                                                                                                      |                       |
| EPI_ISL_1520107                                                                                                                                                                                                                                                                                                                                                                                                                                                                                                                                                                                                                                                                                                                                                                                | LACEN do Estado de Rondonia                                                                                        | Instituto Adolfo Lutz, Interdisciplinary Procedures Center, Strategic Laboratory                                   | Claudio Tavares Sacchi, Claudia Regina Gonçalves, Erica Valessa Ramos Gomes, Karoline Rodrigues Campos, Caio Vinicius Dias Lopes                                                                                                                                                                                                                                                                                                                             |                       |
| EPI_ISL_1520111, EPI_ISL_1520112                                                                                                                                                                                                                                                                                                                                                                                                                                                                                                                                                                                                                                                                                                                                                               | Hospital Municipal Reynaldo Guerra Cajati                                                                          | Instituto Adolfo Lutz, Interdisciplinary Procedures Center, Strategic Laboratory                                   | Claudio Tavares Sacchi, Claudia Regina Gonçalves, Erica Valessa Ramos Gomes, Karoline Rodrigues Campos, Caio Vinicius Dias Lopes                                                                                                                                                                                                                                                                                                                             |                       |
| EPI_ISL_1520113                                                                                                                                                                                                                                                                                                                                                                                                                                                                                                                                                                                                                                                                                                                                                                                | Hospital Santo Antonio de Juquia Juquia                                                                            | Instituto Adolfo Lutz, Interdisciplinary Procedures Center, Strategic Laboratory                                   | Claudio Tavares Sacchi, Claudia Regina Gonçalves, Erica Valessa Ramos Gomes, Karoline Rodrigues Campos, Caio Vinicius Dias Lopes                                                                                                                                                                                                                                                                                                                             |                       |
| EPI_ISL_1520115, EPI_ISL_1520116                                                                                                                                                                                                                                                                                                                                                                                                                                                                                                                                                                                                                                                                                                                                                               | Unidade de Pronto Atendimento UPA                                                                                  | Instituto Adolfo Lutz, Interdisciplinary Procedures Center, Strategic Laboratory                                   | Claudio Tavares Sacchi, Claudia Regina Gonçalves, Erica Valessa Ramos Gomes, Karoline Rodrigues Campos, Caio Vinicius Dias Lopes                                                                                                                                                                                                                                                                                                                             |                       |
| EPI_ISL_1520117, EPI_ISL_1520118, EPI_ISL_1520119, EPI_ISL_1520120, EPI_ISL_1520121, EPI_ISL_1520122, see above                                                                                                                                                                                                                                                                                                                                                                                                                                                                                                                                                                                                                                                                                | Centro de Saude II Dr Jose de Felipe Espito Santo do Pinhal SP                                                     | Instituto Adolfo Lutz, Interdisciplinary Procedures Center, Strategic Laboratory                                   | Claudio Tavares Sacchi, Claudia Regina Gonçalves, Erica Valessa Ramos Gomes, Karoline Rodrigues Campos, Caio Vinicius Dias Lopes                                                                                                                                                                                                                                                                                                                             |                       |
| EPI_ISL_1520137                                                                                                                                                                                                                                                                                                                                                                                                                                                                                                                                                                                                                                                                                                                                                                                | Centro de Saude II Dr Jose Paione Mococa                                                                           | Instituto Adolfo Lutz, Interdisciplinary Procedures Center, Strategic Laboratory                                   | Claudio Tavares Sacchi, Claudia Regina Gonçalves, Erica Valessa Ramos Gomes, Karoline Rodrigues Campos, Caio Vinicius Dias Lopes                                                                                                                                                                                                                                                                                                                             |                       |
| EPI_ISL_1533693                                                                                                                                                                                                                                                                                                                                                                                                                                                                                                                                                                                                                                                                                                                                                                                | Secretaria Municipal de Saude de Ubatuba                                                                           | Instituto Adolfo Lutz, Interdisciplinary Procedures Center, Strategic Laboratory                                   | Claudio Tavares Sacchi, Claudia Regina Gonçalves, Erica Valessa Ramos Gomes, Karoline Rodrigues Campos, Caio Vinicius Dias Lopes, Leonardo Jose Tadeu de Araujo                                                                                                                                                                                                                                                                                              |                       |
| EPI_ISL_1533698                                                                                                                                                                                                                                                                                                                                                                                                                                                                                                                                                                                                                                                                                                                                                                                | Secretaria Municipal de Saude de Birigui                                                                           | Instituto Adolfo Lutz, Interdisciplinary Procedures Center, Strategic Laboratory                                   | Claudio Tavares Sacchi, Claudia Regina Gonçalves, Erica Valessa Ramos Gomes, Karoline Rodrigues Campos, Caio Vinicius Dias Lopes, Leonardo Jose Tadeu de Araujo                                                                                                                                                                                                                                                                                              |                       |
| EPI_ISL_1533700                                                                                                                                                                                                                                                                                                                                                                                                                                                                                                                                                                                                                                                                                                                                                                                | Hospital Estadual de Sapopemba Sao Paulo                                                                           | Instituto Adolfo Lutz, Interdisciplinary Procedures Center, Strategic Laboratory                                   | Claudio Tavares Sacchi, Claudia Regina Gonçalves, Erica Valessa Ramos Gomes, Karoline Rodrigues Campos, Caio Vinicius Dias Lopes, Leonardo Jose Tadeu de Araujo                                                                                                                                                                                                                                                                                              |                       |
| EPI_ISL_1533705                                                                                                                                                                                                                                                                                                                                                                                                                                                                                                                                                                                                                                                                                                                                                                                | Vigilância em Saude                                                                                                | Instituto Adolfo Lutz, Interdisciplinary Procedures Center, Strategic Laboratory                                   | Claudio Tavares Sacchi, Claudia Regina Gonçalves, Erica Valessa Ramos Gomes, Karoline Rodrigues Campos, Caio Vinicius Dias Lopes, Leonardo Jose Tadeu de Araujo                                                                                                                                                                                                                                                                                              |                       |
| EPI_ISL_1533978                                                                                                                                                                                                                                                                                                                                                                                                                                                                                                                                                                                                                                                                                                                                                                                | Laboratorio Central de Saude Publica do Estado do Parana (LACEN-PR)                                                | Laboratory of Respiratory Viruses and Measles, Oswaldo Cruz Institute, FIOCRUZ                                     | Paola Resende, Luciana Appolinario, Fernando Motta, Anna Carolina Paixao, Ana Carolina Mendonca, Alice Sampaio Rocha, Renata Serrano Lopes, Maria do Carmo Debur, Inina Nastassja Riediger, Marilda Siqueira on behalf of the Fiocruz COVID-19 Genomic Surveillance Network                                                                                                                                                                                  |                       |
| EPI_ISL_1533991, EPI_ISL_1533995, EPI_ISL_1533998                                                                                                                                                                                                                                                                                                                                                                                                                                                                                                                                                                                                                                                                                                                                              | Laboratorio de Virologia Molecular / UFRJ                                                                          | Laboratory of Respiratory Viruses and Measles, Oswaldo Cruz Institute, FIOCRUZ                                     | Paola Resende, Carolina M Voloch, Luciana Appolinario, Fernando Motta, Anna Carolina Paixao, Ana Carolina Mendonca, Alice Sampaio Rocha, Renata Serrano Lopes, Amilcar Tanuri, Marilda Siqueira on behalf of the Fiocruz COVID-19 Genomic Surveillance Network                                                                                                                                                                                               |                       |
| EPI_ISL_1534005                                                                                                                                                                                                                                                                                                                                                                                                                                                                                                                                                                                                                                                                                                                                                                                | Laboratory of Respiratory Viruses and Measles, Oswaldo Cruz Institute, FIOCRUZ                                     | Laboratory of Respiratory Viruses and Measles, Oswaldo Cruz Institute, FIOCRUZ                                     | Paola Resende, Luciana Appolinario, Fernando Motta, Anna Carolina Paixao, Ana Carolina Mendonca, Alice Sampaio Rocha, Renata Serrano Lopes, Marilda Siqueira on behalf of the Fiocruz COVID-19 Genomic Surveillance Network                                                                                                                                                                                                                                  |                       |
| EPI_ISL_1534006                                                                                                                                                                                                                                                                                                                                                                                                                                                                                                                                                                                                                                                                                                                                                                                | Laboratorio Central de Saude Publica do Estado de Santa Catarina (LACEN-SC)                                        | Laboratory of Respiratory Viruses and Measles, Oswaldo Cruz Institute, FIOCRUZ                                     | Paola Resende, Luciana Appolinario, Fernando Motta, Anna Carolina Paixao, Ana Carolina Mendonca, Alice Sampaio Rocha, Renata Serrano Lopes, Darcita Buerger Rovaris, Sandra Bianchini Fernandes, Marilda Siqueira on behalf of the Fiocruz COVID-19 Genomic Surveillance Network                                                                                                                                                                             |                       |
| EPI_ISL_1583644, EPI_ISL_1583652, EPI_ISL_1583661, EPI_ISL_1583667, EPI_ISL_1583691, EPI_ISL_1583708                                                                                                                                                                                                                                                                                                                                                                                                                                                                                                                                                                                                                                                                                           | Central Public Health Laboratory - LACEN -Bahia, Salvador, Brazil                                                  | Central Public Health Laboratory - LACEN -Bahia, Salvador, Brazil                                                  | Stephane Tosta, Luciana Oliveira, Vanessa Nardy, Patricia Cajado, Marcela Gómez, Breno Dominguez, Jaqueline Gomes, Wagner Fonseca, Marta Giovanetti, Luiz Alcântara, Felicidade Pereira, Arabela Leal                                                                                                                                                                                                                                                        |                       |
| EPI_ISL_1625977, EPI_ISL_1625979, EPI_ISL_1625980, EPI_ISL_1625981, EPI_ISL_1626000, EPI_ISL_1626005, EPI_ISL_1626007, EPI_ISL_1628345                                                                                                                                                                                                                                                                                                                                                                                                                                                                                                                                                                                                                                                         | Instituto Adolfo Lutz - Regional de Rio Claro                                                                      | Instituto Adolfo Lutz, Interdisciplinary Procedures Center, Strategic Laboratory                                   | Claudio Tavares Sacchi, Claudia Regina Gonçalves, Erica Valessa Ramos Gomes, Karoline Rodrigues Campos, Caio Vinicius Dias Lopes, Leonardo Jose Tadeu de Araujo, Katia Correa de Oliveira Santos                                                                                                                                                                                                                                                             |                       |
| EPI_ISL_1716494                                                                                                                                                                                                                                                                                                                                                                                                                                                                                                                                                                                                                                                                                                                                                                                | LACEN (Laboratorio de Saude Publica Dr. Giovanni Cysneiros)                                                        | LGBio (Laboratorio de Genetica & Biodiversidade)                                                                   | Mariana Pires de Campos Telles, Daniela de Melo e Silva, Elisângela de Paula Silveira Lacerda, Renata de Oliveira Dias, Rhewter Nunes, Cintia Pelegniet Targueta de Azevedo Brito, Ramilla dos Santos Braga, Thais Guimarães Castro, Thays Millena Alves Pedrosa, Amanda Alves de Melo, Aparecido Divino da Cruz, Luiz Augusto Pereira, Thais Cidália Vieira Gigonzac, Marc Alexandre Duarte Gigonzac, Alex Honda Bernardes, Francnyelli Mello Andrade       |                       |
| EPI_ISL_1785611                                                                                                                                                                                                                                                                                                                                                                                                                                                                                                                                                                                                                                                                                                                                                                                | Laboratório de Pesquisa em Virologia, FAMERP, SJRP                                                                 | Laboratório de Pesquisa em Virologia, FAMERP, SJRP                                                                 | Fábio Sossai Possebon; Leila Sabrina Ullmann; Cecília Artico Banho; Cíntia Bittar; Guilherme Campos; Helena Lage Ferreira; Jorge A. Petrolí Marchesi; Livia Sacchetto; Maise C. Pereira Parra; Marília Moraes; Maurício L. Nogueira; Paula Rahal; Paulo Inacio da Costa; João Pessoa Araújo Jr.                                                                                                                                                              |                       |
| EPI_ISL_717921, EPI_ISL_717922, EPI_ISL_717924, EPI_ISL_717925, EPI_ISL_717926, EPI_ISL_717927, EPI_ISL_717928, EPI_ISL_717929, EPI_ISL_717930, EPI_ISL_717931, EPI_ISL_717932, EPI_ISL_717933, EPI_ISL_717934, EPI_ISL_717935, EPI_ISL_717936, EPI_ISL_717937, EPI_ISL_717938, EPI_ISL_717939, EPI_ISL_717940, EPI_ISL_717941, EPI_ISL_717942, EPI_ISL_717943, EPI_ISL_717944, EPI_ISL_717945, EPI_ISL_717946, EPI_ISL_717947, EPI_ISL_717948, EPI_ISL_717949, EPI_ISL_717950, EPI_ISL_717951, EPI_ISL_717952, EPI_ISL_717953, EPI_ISL_717954, EPI_ISL_717955, EPI_ISL_717956, EPI_ISL_717957                                                                                                                                                                                                 | Laboratório de Virologia Molecular / UFRJ                                                                          | Bioinformatics Laboratory / LNCC                                                                                   | Carolina M Voloch, Ronaldo da Silva F Jr, Luiz G P de Almeida, Cynthia C Cardoso, Otavio Bustrólini, Alexandra L Gerber, Ana Paula de C Guimarães, Diana Mariani, Andréa Cony Cavalcanti, Claudia dos Santos Rodrigues, Terezinha M P P Castilheira, Amilcar Tanuri, Ana Tereza R de Vasconcelos                                                                                                                                                             |                       |
| EPI_ISL_755642                                                                                                                                                                                                                                                                                                                                                                                                                                                                                                                                                                                                                                                                                                                                                                                 | Instituto Adolfo Lutz - Central                                                                                    | Instituto Adolfo Lutz, Interdisciplinary Procedures Center, Strategic Laboratory                                   | Claudio Tavares Sacchi, Claudia Regina Gonçalves, Erica Valessa Ramos Gomes, Karoline Rodrigues Campos                                                                                                                                                                                                                                                                                                                                                       |                       |
| EPI_ISL_755645                                                                                                                                                                                                                                                                                                                                                                                                                                                                                                                                                                                                                                                                                                                                                                                 | Lab LOC - Itapeericica da Serra                                                                                    | Instituto Adolfo Lutz, Interdisciplinary Procedures Center, Strategic Laboratory                                   | Claudio Tavares Sacchi, Claudia Regina Gonçalves, Erica Valessa Ramos Gomes, Karoline Rodrigues Campos                                                                                                                                                                                                                                                                                                                                                       |                       |
| EPI_ISL_755651, EPI_ISL_755653                                                                                                                                                                                                                                                                                                                                                                                                                                                                                                                                                                                                                                                                                                                                                                 | Instituto Adolfo Lutz - Central                                                                                    | Instituto Adolfo Lutz, Interdisciplinary Procedures Center, Strategic Laboratory                                   | Claudio Tavares Sacchi, Claudia Regina Gonçalves, Erica Valessa Ramos Gomes, Karoline Rodrigues Campos                                                                                                                                                                                                                                                                                                                                                       |                       |
| EPI_ISL_756294                                                                                                                                                                                                                                                                                                                                                                                                                                                                                                                                                                                                                                                                                                                                                                                 | Center for Biotechnology and Cell Therapy, São Rafael Hospital, Salvador, Brazil                                   | Center for Biotechnology and Cell Therapy, São Rafael Hospital, Salvador, Brazil                                   | Carolina Kymie Vasques Nonaka, Marília Miranda Franco, Tiago Gráf, Ana Verena Almeida Mendes, Renato Santana de Aguiar, Marta Giovanetti, Bruno Solano de Freitas Souza                                                                                                                                                                                                                                                                                      |                       |
| EPI_ISL_770552, EPI_ISL_770553, EPI_ISL_770554, EPI_ISL_770556, EPI_ISL_770557, EPI_ISL_770559, EPI_ISL_770560, EPI_ISL_770561, EPI_ISL_770563, EPI_ISL_770564, EPI_ISL_770565, EPI_ISL_770566, EPI_ISL_770568, EPI_ISL_770570, EPI_ISL_770571, EPI_ISL_770578, EPI_ISL_770579, EPI_ISL_770580, EPI_ISL_770581, EPI_ISL_770583, EPI_ISL_770584, EPI_ISL_770587, EPI_ISL_770589, EPI_ISL_770591, EPI_ISL_770592, EPI_ISL_770593, EPI_ISL_770594, EPI_ISL_770595, EPI_ISL_770596, EPI_ISL_770598, EPI_ISL_770602, EPI_ISL_770603, EPI_ISL_770604, EPI_ISL_770605, EPI_ISL_770606, EPI_ISL_770607, EPI_ISL_770616, EPI_ISL_770617, EPI_ISL_770618, EPI_ISL_770619, EPI_ISL_770620, EPI_ISL_770621, EPI_ISL_770622, EPI_ISL_770624, EPI_ISL_770625, EPI_ISL_770628, EPI_ISL_779155, EPI_ISL_779159 | Laboratório de Microbiologia Molecular - Universidade FEEVALE                                                      | Bioinformatics Laboratory / LNCC                                                                                   | Felipe Benites, Fernando Rosado Spilki, Alana Witt Hansen, Juliane Deise Fleck, Juliana Schons, Meriane Demoliner, Ana Karolina Eisen Antunes, Fagner Henrique Heldt, Larissa Mallmann, Bruna Hermann, Ana Luiza Ziulkoski, Victória Goes, Karoline Schallenberger, Matheus Nunes Weber, Paula Rodrigues de Almeida, Alessandra Pavan Lamarca da Silva F Jr., Luiz G P de Almeida, Alexandra L Gerber, Ana Paula de C Guimarães, Ana Tereza R de Vasconcelos |                       |
| EPI_ISL_792560                                                                                                                                                                                                                                                                                                                                                                                                                                                                                                                                                                                                                                                                                                                                                                                 | Laboratorio de Ecologia de Doencas Transmissíveis na Amazonia, Instituto Leonidas e Maria Deane - Fiocruz Amazonia | Laboratorio de Ecologia de Doencas Transmissíveis na Amazonia, Instituto Leonidas e Maria Deane - Fiocruz Amazonia | Valdinete Nascimento, Victor Souza, André Corado, Fernanda Nascimento, George Silva, Âgatha Costa, Karina Pessoa, Debora Duarte, Luciana Gonçalves, Maria Júlia Brandão, Michele Jesus, Felipe Naveca on behalf of the Fiocruz COVID-19 Genomic Surveillance Network                                                                                                                                                                                         |                       |
| EPI_ISL_792562, EPI_ISL_792634, EPI_ISL_792635                                                                                                                                                                                                                                                                                                                                                                                                                                                                                                                                                                                                                                                                                                                                                 | Laboratório Central de Saúde Pública do Estado da Paraíba (LACEN-PB)                                               | Laboratory of Respiratory Viruses and Measles, Oswaldo Cruz Institute, FIOCRUZ                                     | Paola Resende, Luciana Appolinario, Fernando Motta, Anna Carolina Paixao, Ana Carolina Mendonca, João Felipe Bezerra, Romero Henrique Teixeira de Vasconcelos, Daiane Loudal Florentino Teixeira, Thiago Franco de Oliveira Carneiro, Marilda Siqueira on behalf of the Fiocruz COVID-19 Genomic Surveillance Network                                                                                                                                        |                       |

|                                                                                                                                                |                                                                               |                                                                                                               |                                                                                                                                                                                                                                                                   |
|------------------------------------------------------------------------------------------------------------------------------------------------|-------------------------------------------------------------------------------|---------------------------------------------------------------------------------------------------------------|-------------------------------------------------------------------------------------------------------------------------------------------------------------------------------------------------------------------------------------------------------------------|
| EPI_ISL_792639                                                                                                                                 | Laboratório Central de Saúde Pública do Estado de Alagoas (LACEN-AL)          | Laboratory of Respiratory Viruses and Measles, Oswaldo Cruz Institute, FIOCRUZ                                | Paola Resende, Luciana Appolinario, Fernando Motta, Anna Carolina Paixao, Ana Carolina Mendonca, Anderson Brandao Leite, Marilda Siqueira on behalf of the Fiocruz COVID-19 Genomic Surveillance Network                                                          |
| EPI_ISL_792645, EPI_ISL_792646, EPI_ISL_792650, EPI_ISL_792651, EPI_ISL_792652                                                                 | Laboratório Central de Saúde Pública do Estado do Paraná (LACEN-PR)           | Laboratory of Respiratory Viruses and Measles, Oswaldo Cruz Institute, FIOCRUZ                                | Paola Resende, Luciana Appolinario, Fernando Motta, Anna Carolina Paixao, Ana Carolina Mendonca, Maria do Carmo Debur, Irina Nastassja Riediger, Marilda Siqueira on behalf of the Fiocruz COVID-19 Genomic Surveillance Network                                  |
| EPI_ISL_832010                                                                                                                                 | Laboratório de Microbiologia Molecular - Universidade FEEVALE                 | Universidade Federal de Ciências da Saúde de Porto Alegre                                                     | Vinicius Bonetti Franceschi, Amanda de Menezes Mayer, Gabriel Dickin Caldana, Carla Andretta Moreira Neves, Patricia Aline Gröhs Ferrareze, Gabriela Bettella Cybis, Ricardo Ariel Zimmerman, Livia Krmetzsch, Fernando Rosado Spilki, Claudia Elizabeth Thompson |
| EPI_ISL_833158                                                                                                                                 | Instituto Adolfo Lutz - Regional de Santo Andre                               | Instituto Adolfo Lutz, Interdisciplinary Procedures Center, Strategic Laboratory                              | Claudio Tavares Sacchi, Claudia Regina Gonçalves, Erica Valessa Ramos Gomes, Karoline Rodrigues Campos                                                                                                                                                            |
| EPI_ISL_833161                                                                                                                                 | Instituto Adolfo Lutz - Central                                               | Instituto Adolfo Lutz, Interdisciplinary Procedures Center, Strategic Laboratory                              | Claudio Tavares Sacchi, Claudia Regina Gonçalves, Erica Valessa Ramos Gomes, Karoline Rodrigues Campos                                                                                                                                                            |
| EPI_ISL_833175, EPI_ISL_833176                                                                                                                 | DB Diagnosticos do Brasil                                                     | Instituto Adolfo Lutz, Interdisciplinary Procedures Center, Strategic Laboratory                              | Claudio Tavares Sacchi, Claudia Regina Gonçalves, Erica Valessa Ramos Gomes, Karoline Rodrigues Campos                                                                                                                                                            |
| EPI_ISL_836143                                                                                                                                 | Hospital de Campanha COVID-19 de Mairipora                                    | Instituto Adolfo Lutz, Interdisciplinary Procedures Center, Strategic Laboratory                              | Claudio Tavares Sacchi, Claudia Regina Gonçalves, Erica Valessa Ramos Gomes, Karoline Rodrigues Campos                                                                                                                                                            |
| EPI_ISL_836977                                                                                                                                 | Hospital Municipal Dr. Jose de Carvalho Florence                              | Instituto Adolfo Lutz, Interdisciplinary Procedures Center, Strategic Laboratory                              | Claudio Tavares Sacchi, Claudia Regina Gonçalves, Erica Valessa Ramos Gomes, Karoline Rodrigues Campos                                                                                                                                                            |
| EPI_ISL_848557, EPI_ISL_848606, EPI_ISL_848607                                                                                                 | Evandro Chagas Institute                                                      | Evandro Chagas Institute                                                                                      | Santos, M.C.; Silva, A.M.; Junior, W.D.C.; Barbagelata, L.S.; Ferreira, J.A.; Sousa, E.M.A.; da Silva, P.S.; Pinheiro, K.C.; L.C.; Sousa Junior, E.C.                                                                                                             |
| EPI_ISL_861668                                                                                                                                 | Centro de Triagem Covid19                                                     | Instituto Adolfo Lutz, Interdisciplinary Procedures Center, Strategic Laboratory                              | Claudio Tavares Sacchi, Claudia Regina Gonçalves, Erica Valessa Ramos Gomes, Karoline Rodrigues Campos                                                                                                                                                            |
| EPI_ISL_861674, EPI_ISL_861675                                                                                                                 | UPA Central de Caraguatatuba                                                  | Instituto Adolfo Lutz, Interdisciplinary Procedures Center, Strategic Laboratory                              | Claudio Tavares Sacchi, Claudia Regina Gonçalves, Erica Valessa Ramos Gomes, Karoline Rodrigues Campos                                                                                                                                                            |
| EPI_ISL_861676                                                                                                                                 | UPA Vila Santa Catarina                                                       | Instituto Adolfo Lutz, Interdisciplinary Procedures Center, Strategic Laboratory                              | Claudio Tavares Sacchi, Claudia Regina Gonçalves, Erica Valessa Ramos Gomes, Karoline Rodrigues Campos                                                                                                                                                            |
| EPI_ISL_861677                                                                                                                                 | Instituto Adolfo Lutz - Central                                               | Instituto Adolfo Lutz, Interdisciplinary Procedures Center, Strategic Laboratory                              | Claudio Tavares Sacchi, Claudia Regina Gonçalves, Erica Valessa Ramos Gomes, Karoline Rodrigues Campos                                                                                                                                                            |
| EPI_ISL_861679                                                                                                                                 | Instituto Adolfo Lutz - Regional de Taubate                                   | Instituto Adolfo Lutz, Interdisciplinary Procedures Center, Strategic Laboratory                              | Claudio Tavares Sacchi, Claudia Regina Gonçalves, Erica Valessa Ramos Gomes, Karoline Rodrigues Campos                                                                                                                                                            |
| EPI_ISL_861683                                                                                                                                 | Complexo Hospitalar Padre Bento de Guarulhos                                  | Instituto Adolfo Lutz, Interdisciplinary Procedures Center, Strategic Laboratory                              | Claudio Tavares Sacchi, Claudia Regina Gonçalves, Erica Valessa Ramos Gomes, Karoline Rodrigues Campos                                                                                                                                                            |
| EPI_ISL_861684, EPI_ISL_861685                                                                                                                 | Hospital Pronto Socorro Itaquera                                              | Instituto Adolfo Lutz, Interdisciplinary Procedures Center, Strategic Laboratory                              | Claudio Tavares Sacchi, Claudia Regina Gonçalves, Erica Valessa Ramos Gomes, Karoline Rodrigues Campos                                                                                                                                                            |
| EPI_ISL_861870, EPI_ISL_861872, EPI_ISL_861877, EPI_ISL_861878, EPI_ISL_861880, EPI_ISL_861882, EPI_ISL_861883, EPI_ISL_861887, EPI_ISL_861904 | LATE - Laboratório de Técnicas Especiais - Hospital Israelita Albert Einstein | LATE - Laboratório de Técnicas Especiais - Hospital Israelita Albert Einstein                                 | Deyvid Amgarten, Fernanda de Mello Malta, Raquel Riyuzo, Ana Paula Moreira Salles, Pedro Henrique Sebe Rodrigues, João Renato Rebelo Pinho                                                                                                                        |
| EPI_ISL_882668                                                                                                                                 | UMS de Juquitiba                                                              | Instituto Adolfo Lutz, Interdisciplinary Procedures Center, Strategic Laboratory                              | Claudio Tavares Sacchi, Claudia Regina Gonçalves, Erica Valessa Ramos Gomes, Karoline Rodrigues Campos                                                                                                                                                            |
| EPI_ISL_882669                                                                                                                                 | UPA Vila Santa Catarina                                                       | Instituto Adolfo Lutz, Interdisciplinary Procedures Center, Strategic Laboratory                              | Claudio Tavares Sacchi, Claudia Regina Gonçalves, Erica Valessa Ramos Gomes, Karoline Rodrigues Campos                                                                                                                                                            |
| EPI_ISL_882671, EPI_ISL_882673                                                                                                                 | Hospital Municipal Dr. Guido Guida                                            | Instituto Adolfo Lutz, Interdisciplinary Procedures Center, Strategic Laboratory                              | Claudio Tavares Sacchi, Claudia Regina Gonçalves, Erica Valessa Ramos Gomes, Karoline Rodrigues Campos                                                                                                                                                            |
| EPI_ISL_906070, EPI_ISL_906072                                                                                                                 | UPA Dr. Akira Tada                                                            | Instituto Adolfo Lutz, Interdisciplinary Procedures Center, Strategic Laboratory                              | Claudio Tavares Sacchi, Claudia Regina Gonçalves, Erica Valessa Ramos Gomes, Karoline Rodrigues Campos                                                                                                                                                            |
| EPI_ISL_918514                                                                                                                                 | Evandro Chagas Institute                                                      | Evandro Chagas Institute                                                                                      | Santos, M.C.; Silva, A.M.; Junior, W.D.C.; Barbagelata, L.S.; Ferreira, J.A.; Sousa, E.M.A.; da Silva, P.S.; Pinheiro, K.C.; L.C.; Sousa Junior, E.C.                                                                                                             |
| EPI_ISL_918516, EPI_ISL_918517                                                                                                                 | LACEN - Laboratório Central de Saúde Pública do Para                          | Evandro Chagas Institute                                                                                      | Santos, M.C.; Silva, A.M.; Junior, W.D.C.; Barbagelata, L.S.; Ferreira, J.A.; Sousa, E.M.A.; da Silva, P.S.; Pinheiro, K.C.; L.C.; Sousa Junior, E.C.                                                                                                             |
| EPI_ISL_918519, EPI_ISL_918520, EPI_ISL_918521                                                                                                 | Evandro Chagas Institute                                                      | Evandro Chagas Institute                                                                                      | Santos, M.C.; Silva, A.M.; Junior, W.D.C.; Barbagelata, L.S.; Ferreira, J.A.; Sousa, E.M.A.; da Silva, P.S.; Pinheiro, K.C.; L.C.; Sousa Junior, E.C.                                                                                                             |
| EPI_ISL_918523, EPI_ISL_918526, EPI_ISL_918527, EPI_ISL_918528, EPI_ISL_918529, EPI_ISL_918530                                                 | LACEN - Laboratório Central de Saúde Pública do Para                          | Evandro Chagas Institute                                                                                      | Santos, M.C.; Silva, A.M.; Junior, W.D.C.; Barbagelata, L.S.; Ferreira, J.A.; Sousa, E.M.A.; da Silva, P.S.; Pinheiro, K.C.; L.C.; Sousa Junior, E.C.                                                                                                             |
| EPI_ISL_918534                                                                                                                                 | LACEN - Laboratório Central de Saúde Pública do Amazonas                      | Evandro Chagas Institute                                                                                      | Santos, M.C.; Silva, A.M.; Junior, W.D.C.; Barbagelata, L.S.; Ferreira, J.A.; Sousa, E.M.A.; da Silva, P.S.; Pinheiro, K.C.; L.C.; Sousa Junior, E.C.                                                                                                             |
| EPI_ISL_918537, EPI_ISL_918538, EPI_ISL_918540, EPI_ISL_918541, EPI_ISL_918542, EPI_ISL_918543, EPI_ISL_918544                                 | LACEN - Laboratório Central de Saúde Pública do Ceara                         | Evandro Chagas Institute                                                                                      | Santos, M.C.; Silva, A.M.; Junior, W.D.C.; Barbagelata, L.S.; Ferreira, J.A.; Sousa, E.M.A.; da Silva, P.S.; Pinheiro, K.C.; L.C.; Sousa Junior, E.C.                                                                                                             |
| EPI_ISL_918545, EPI_ISL_918546, EPI_ISL_918547, EPI_ISL_918548, EPI_ISL_918549, EPI_ISL_918552                                                 | LACEN - Laboratório Central de Saúde Pública do Para                          | Evandro Chagas Institute                                                                                      | Santos, M.C.; Silva, A.M.; Junior, W.D.C.; Barbagelata, L.S.; Ferreira, J.A.; Sousa, E.M.A.; da Silva, P.S.; Pinheiro, K.C.; L.C.; Sousa Junior, E.C.                                                                                                             |
| EPI_ISL_918553, EPI_ISL_918555, EPI_ISL_918556, EPI_ISL_918557, EPI_ISL_918558, EPI_ISL_918559, EPI_ISL_918560, EPI_ISL_918561                 | LACEN - Laboratório Central de Saúde Pública do Amapa                         | Evandro Chagas Institute                                                                                      | Santos, M.C.; Silva, A.M.; Junior, W.D.C.; Barbagelata, L.S.; Ferreira, J.A.; Sousa, E.M.A.; da Silva, P.S.; Pinheiro, K.C.; L.C.; Sousa Junior, E.C.                                                                                                             |
| EPI_ISL_940628                                                                                                                                 | Unidade Mista de Iguape                                                       | Instituto Adolfo Lutz, Interdisciplinary Procedures Center, Strategic Laboratory                              | Claudio Tavares Sacchi, Claudia Regina Gonçalves, Erica Valessa Ramos Gomes, Karoline Rodrigues Campos                                                                                                                                                            |
| EPI_ISL_943607, EPI_ISL_943608, EPI_ISL_943610                                                                                                 | Central Laboratory of Public Health of Rio Grande do Sul (Lacem-RS)           | State Center for Health Surveillance of the Health Department of the State of Rio Grande do Sul (CEVS/SES-RS) | Aline Campos, Amanda da Silva, Anelise Schaurich, Claudia Dornelles, Cynthia Molina, Fernanda Godinho, Lara Crescente, Leticia Garay, Regina Barcellos, Richard Salvato, Tatiana Gregianini, Vagner Fonseca                                                       |
| EPI_ISL_943986                                                                                                                                 | LACEN do Estado de Tocantins                                                  | Instituto Adolfo Lutz, Interdisciplinary Procedures Center, Strategic Laboratory                              | Claudio Tavares Sacchi, Claudia Regina Gonçalves, Erica Valessa Ramos Gomes, Karoline Rodrigues Campos                                                                                                                                                            |
| EPI_ISL_943989                                                                                                                                 | LACEN do Estado de Goias                                                      | Instituto Adolfo Lutz, Interdisciplinary Procedures Center,                                                   | Claudio Tavares Sacchi, Claudia Regina Gonçalves, Erica Valessa Ramos Gomes, Karoline Rodrigues Campos                                                                                                                                                            |

EPI\_ISL\_977489

UPA Dr. Akira Tada

Strategic Laboratory

Instituto Adolfo Lutz, Interdisciplinary Procedures Center,  
Strategic Laboratory

Claudio Tavares Sacchi, Claudia Regina Gonçalves, Erica Valessa Ramos Gomes, Karoline Rodrigues Campos

EPI\_ISL\_983863, EPI\_ISL\_983864,  
EPI\_ISL\_983867

Central Laboratory of Public Health of Rio Grande do Sul  
(Lacen-RS)

State Center for Health Surveillance of the Health Department  
of the State of Rio Grande do Sul (CEVS/SES-RS)

Aline Campos, Cynthia Molina, Lara Crescente, Leticia Garay, Ludmila Fiorenzano Baethgen, Richard Salvato, Tatiana Gregianini

EPI\_ISL\_984247, EPI\_ISL\_984249,  
EPI\_ISL\_984250, EPI\_ISL\_984252,  
EPI\_ISL\_984255, EPI\_ISL\_984257,  
EPI\_ISL\_984258, EPI\_ISL\_984260,  
EPI\_ISL\_984261, EPI\_ISL\_984262

IAL Regional de Marília

Instituto Adolfo Lutz, Interdisciplinary Procedures Center,  
Strategic Laboratory

Claudio Tavares Sacchi, Claudia Regina Gonçalves, Erica Valessa Ramos Gomes, Karoline Rodrigues Campos
