# Supplementary material for: Spatiotemporal dissemination pattern of SARS-CoV-2 B1.1.28-derived lineages introduced into Uruguay across its southeastern border with Brazil
Source: bioRxiv or medRxiv preprint supplement (doi:10.1101/2021.07.05.21259760), 2021-07-07
Supplement: Supplementary file [file media-8.pdf]

We gratefully acknowledge the following Authors from the Originating laboratories responsible for obtaining the specimens, as well as the Submitting laboratories where the genome data were generated and shared via GISAID, on which this research is based.

All Submitters of data may be contacted directly via [www.gisaid.org](http://www.gisaid.org)

Authors are sorted alphabetically.

| Accession ID                                                                                                                                                                                                                                                                                                                                                                                                                                                                                                                                                                                                                                                                                                                                                                                                                                                                                                                        | Originating Laboratory                                                                                             | Submitting Laboratory                                                                                              | Authors                                                                                                                                                                                                                                                                             |
|-------------------------------------------------------------------------------------------------------------------------------------------------------------------------------------------------------------------------------------------------------------------------------------------------------------------------------------------------------------------------------------------------------------------------------------------------------------------------------------------------------------------------------------------------------------------------------------------------------------------------------------------------------------------------------------------------------------------------------------------------------------------------------------------------------------------------------------------------------------------------------------------------------------------------------------|--------------------------------------------------------------------------------------------------------------------|--------------------------------------------------------------------------------------------------------------------|-------------------------------------------------------------------------------------------------------------------------------------------------------------------------------------------------------------------------------------------------------------------------------------|
| EPI_ISL_1000671, EPI_ISL_1000673                                                                                                                                                                                                                                                                                                                                                                                                                                                                                                                                                                                                                                                                                                                                                                                                                                                                                                    | Instituto de Biotecnologia - UNESP-Botucatu-SP                                                                     | Instituto de Biotecnologia - UNESP-Botucatu-SP                                                                     | Leila Sabrina Ullmann; Fábio Sossai Possebon, Camila Dantas Malossi, Paula Rahal, Paulo Inacio da Costa, João Pessoa Araújo Jr.                                                                                                                                                     |
| EPI_ISL_1034304, EPI_ISL_1034306                                                                                                                                                                                                                                                                                                                                                                                                                                                                                                                                                                                                                                                                                                                                                                                                                                                                                                    | Laboratório de Ecologia de Doenças Transmissíveis na Amazonia, Instituto Leonidas e Maria Deane - Fiocruz Amazonia | Laboratório de Ecologia de Doenças Transmissíveis na Amazonia, Instituto Leonidas e Maria Deane - Fiocruz Amazonia | Valdinete Nascimento, Victor Souza, André Corado, Fernanda Nascimento, George Silva, Ágatha Costa, Debora Duarte, Karina Pessoa, Matilde Mejía, Luciana Gonçalves, Maria Júlia Brandão, Michele Jesus, Felipe Naveca on behalf of the Fiocruz COVID-19 Genomic Surveillance Network |
| EPI_ISL_1039691, EPI_ISL_1039692, EPI_ISL_1039693, EPI_ISL_1039694, EPI_ISL_1039695, EPI_ISL_1041509                                                                                                                                                                                                                                                                                                                                                                                                                                                                                                                                                                                                                                                                                                                                                                                                                                | LACEN do Estado de Goias                                                                                           | Instituto Adolfo Lutz, Interdisciplinary Procedures Center, Strategic Laboratory                                   | Claudio Tavares Sacchi, Claudia Regina Gonçalves, Erica Valessa Ramos Gomes, Karoline Rodrigues Campos                                                                                                                                                                              |
| EPI_ISL_1067728                                                                                                                                                                                                                                                                                                                                                                                                                                                                                                                                                                                                                                                                                                                                                                                                                                                                                                                     | Center for Biotechnology and Cell Therapy, São Rafael Hospital, Salvador, Brazil                                   | Central Public Health Laboratory - LACEN -Bahia, Salvador, Brazil                                                  | Stephane Tosta, Luciana Oliveira, Vanessa Nardy, Patrícia Cajado, Marcela Gómez, Breno Dominguez, Jaqueline Gomes, Vagner Fonseca, Marta Giovanetti, Luiz Alcantara, Felicidade Pereira, Arabela Leal                                                                               |
| EPI_ISL_1067729, EPI_ISL_1067730, EPI_ISL_1067731                                                                                                                                                                                                                                                                                                                                                                                                                                                                                                                                                                                                                                                                                                                                                                                                                                                                                   | Central Public Health Laboratory - LACEN -Bahia, Salvador, Brazil                                                  | Central Public Health Laboratory - LACEN -Bahia, Salvador, Brazil                                                  | Stephane Tosta, Luciana Oliveira, Vanessa Nardy, Patrícia Cajado, Marcela Gómez, Breno Dominguez, Jaqueline Gomes, Vagner Fonseca, Marta Giovanetti, Luiz Alcantara, Felicidade Pereira, Arabela Leal                                                                               |
| EPI_ISL_1067732                                                                                                                                                                                                                                                                                                                                                                                                                                                                                                                                                                                                                                                                                                                                                                                                                                                                                                                     | Center for Biotechnology and Cell Therapy, São Rafael Hospital, Salvador, Brazil                                   | Central Public Health Laboratory - LACEN -Bahia, Salvador, Brazil                                                  | Stephane Tosta, Luciana Oliveira, Vanessa Nardy, Patrícia Cajado, Marcela Gómez, Breno Dominguez, Jaqueline Gomes, Vagner Fonseca, Marta Giovanetti, Luiz Alcantara, Felicidade Pereira, Arabela Leal                                                                               |
| EPI_ISL_1067733, EPI_ISL_1067734, EPI_ISL_1067735                                                                                                                                                                                                                                                                                                                                                                                                                                                                                                                                                                                                                                                                                                                                                                                                                                                                                   | Central Public Health Laboratory - LACEN -Bahia, Salvador, Brazil                                                  | Central Public Health Laboratory - LACEN -Bahia, Salvador, Brazil                                                  | Stephane Tosta, Luciana Oliveira, Vanessa Nardy, Patrícia Cajado, Marcela Gómez, Breno Dominguez, Jaqueline Gomes, Vagner Fonseca, Marta Giovanetti, Luiz Alcantara, Felicidade Pereira, Arabela Leal                                                                               |
| EPI_ISL_1067736                                                                                                                                                                                                                                                                                                                                                                                                                                                                                                                                                                                                                                                                                                                                                                                                                                                                                                                     | Center for Biotechnology and Cell Therapy, São Rafael Hospital, Salvador, Brazil                                   | Central Public Health Laboratory - LACEN -Bahia, Salvador, Brazil                                                  | Stephane Tosta, Luciana Oliveira, Vanessa Nardy, Patrícia Cajado, Marcela Gómez, Breno Dominguez, Jaqueline Gomes, Vagner Fonseca, Marta Giovanetti, Luiz Alcantara, Felicidade Pereira, Arabela Leal                                                                               |
| EPI_ISL_1067737, EPI_ISL_1067738                                                                                                                                                                                                                                                                                                                                                                                                                                                                                                                                                                                                                                                                                                                                                                                                                                                                                                    | Central Public Health Laboratory - LACEN -Bahia, Salvador, Brazil                                                  | Central Public Health Laboratory - LACEN -Bahia, Salvador, Brazil                                                  | Stephane Tosta, Luciana Oliveira, Vanessa Nardy, Patrícia Cajado, Marcela Gómez, Breno Dominguez, Jaqueline Gomes, Vagner Fonseca, Marta Giovanetti, Luiz Alcantara, Felicidade Pereira, Arabela Leal                                                                               |
| EPI_ISL_1068110, EPI_ISL_1068111, EPI_ISL_1068112, EPI_ISL_1068114, EPI_ISL_1068149, EPI_ISL_1068150, EPI_ISL_1068151, EPI_ISL_1068154, EPI_ISL_1068156, EPI_ISL_1068157, EPI_ISL_1068158, EPI_ISL_1068159, EPI_ISL_1068160, EPI_ISL_1068169, EPI_ISL_1068198, EPI_ISL_1068221, EPI_ISL_1068222, EPI_ISL_1068225, EPI_ISL_1068226, EPI_ISL_1068243, EPI_ISL_1068248, EPI_ISL_1068249, EPI_ISL_1068258, EPI_ISL_1068260, EPI_ISL_1068261, EPI_ISL_1068262, EPI_ISL_1068263, EPI_ISL_1068264, EPI_ISL_1068266, EPI_ISL_1068268, EPI_ISL_1068269, EPI_ISL_1068270, EPI_ISL_1068271, EPI_ISL_1068272, EPI_ISL_1068273, EPI_ISL_1068274, EPI_ISL_1068275, EPI_ISL_1068276, EPI_ISL_1068278, EPI_ISL_1068279, EPI_ISL_1068280, EPI_ISL_1068281, EPI_ISL_1068282, EPI_ISL_1068283, EPI_ISL_1068284, EPI_ISL_1068285, EPI_ISL_1068286, EPI_ISL_1068287, EPI_ISL_1068288, EPI_ISL_1068289, EPI_ISL_1068290, EPI_ISL_1068291, EPI_ISL_1068292 | Laboratório de Ecologia de Doenças Transmissíveis na Amazonia, Instituto Leonidas e Maria Deane - Fiocruz Amazonia | Laboratório de Ecologia de Doenças Transmissíveis na Amazonia, Instituto Leonidas e Maria Deane - Fiocruz Amazonia | Valdinete Nascimento, Victor Souza, André Corado, Fernanda Nascimento, George Silva, Ágatha Costa, Debora Duarte, Karina Pessoa, Matilde Mejía, Luciana Gonçalves, Maria Júlia Brandão, Michele Jesus, Felipe Naveca on behalf of the Fiocruz COVID-19 Genomic Surveillance Network |
| see above                                                                                                                                                                                                                                                                                                                                                                                                                                                                                                                                                                                                                                                                                                                                                                                                                                                                                                                           | Laboratório de Ecologia de Doenças Transmissíveis na Amazonia, Instituto Leonidas e Maria Deane - Fiocruz Amazonia | Laboratório de Ecologia de Doenças Transmissíveis na Amazonia, Instituto Leonidas e Maria Deane - Fiocruz Amazonia | Valdinete Nascimento, Victor Souza, André Corado, Fernanda Nascimento, George Silva, Ágatha Costa, Debora Duarte, Karina Pessoa, Matilde Mejía, Luciana Gonçalves, Maria Júlia Brandão, Michele Jesus, Felipe Naveca on behalf of the Fiocruz COVID-19 Genomic Surveillance Network |
| EPI_ISL_1078992, EPI_ISL_1079002, EPI_ISL_1079008, EPI_ISL_1079162                                                                                                                                                                                                                                                                                                                                                                                                                                                                                                                                                                                                                                                                                                                                                                                                                                                                  | IAL Regional de Bauru                                                                                              | Instituto Adolfo Lutz, Interdisciplinary Procedures Center, Strategic Laboratory                                   | Claudio Tavares Sacchi, Claudia Regina Gonçalves, Erica Valessa Ramos Gomes, Karoline Rodrigues Campos                                                                                                                                                                              |
| EPI_ISL_1086035, EPI_ISL_1086036                                                                                                                                                                                                                                                                                                                                                                                                                                                                                                                                                                                                                                                                                                                                                                                                                                                                                                    | IAL Regional de Bauru                                                                                              | Instituto Adolfo Lutz, Interdisciplinary Procedures Center, Strategic Laboratory                                   | Claudio Tavares Sacchi, Claudia Regina Gonçalves, Erica Valessa Ramos Gomes, Karoline Rodrigues Campos, Caio Vinicius Dias Lopes                                                                                                                                                    |
| EPI_ISL_1086037, EPI_ISL_1086038, EPI_ISL_1086039, EPI_ISL_1086040, EPI_ISL_1086041, EPI_ISL_1086043                                                                                                                                                                                                                                                                                                                                                                                                                                                                                                                                                                                                                                                                                                                                                                                                                                | Diagnosticos da America - DASA                                                                                     | Instituto Adolfo Lutz, Interdisciplinary Procedures Center, Strategic Laboratory                                   | Claudio Tavares Sacchi, Claudia Regina Gonçalves, Erica Valessa Ramos Gomes, Karoline Rodrigues Campos, Caio Vinicius Dias Lopes                                                                                                                                                    |
| EPI_ISL_1086044, EPI_ISL_1086045, EPI_ISL_1086046, EPI_ISL_1086047, EPI_ISL_1096120                                                                                                                                                                                                                                                                                                                                                                                                                                                                                                                                                                                                                                                                                                                                                                                                                                                 | IAL Regional de Bauru                                                                                              | Instituto Adolfo Lutz, Interdisciplinary Procedures Center, Strategic Laboratory                                   | Claudio Tavares Sacchi, Claudia Regina Gonçalves, Erica Valessa Ramos Gomes, Karoline Rodrigues Campos, Caio Vinicius Dias Lopes                                                                                                                                                    |
| EPI_ISL_1096121                                                                                                                                                                                                                                                                                                                                                                                                                                                                                                                                                                                                                                                                                                                                                                                                                                                                                                                     | Diagnosticos da America - DASA                                                                                     | Instituto Adolfo Lutz, Interdisciplinary Procedures Center, Strategic Laboratory                                   | Claudio Tavares Sacchi, Claudia Regina Gonçalves, Erica Valessa Ramos Gomes, Karoline Rodrigues Campos, Caio Vinicius Dias Lopes                                                                                                                                                    |
| EPI_ISL_1096122, EPI_ISL_1096124, EPI_ISL_1096134                                                                                                                                                                                                                                                                                                                                                                                                                                                                                                                                                                                                                                                                                                                                                                                                                                                                                   | IAL Regional de Bauru                                                                                              | Instituto Adolfo Lutz, Interdisciplinary Procedures Center, Strategic Laboratory                                   | Claudio Tavares Sacchi, Claudia Regina Gonçalves, Erica Valessa Ramos Gomes, Karoline Rodrigues Campos, Caio Vinicius Dias Lopes                                                                                                                                                    |
| EPI_ISL_1096135                                                                                                                                                                                                                                                                                                                                                                                                                                                                                                                                                                                                                                                                                                                                                                                                                                                                                                                     | Diagnosticos da America - DASA                                                                                     | Instituto Adolfo Lutz, Interdisciplinary Procedures Center, Strategic Laboratory                                   | Claudio Tavares Sacchi, Claudia Regina Gonçalves, Erica Valessa Ramos Gomes, Karoline Rodrigues Campos, Caio Vinicius Dias Lopes                                                                                                                                                    |
| EPI_ISL_811149                                                                                                                                                                                                                                                                                                                                                                                                                                                                                                                                                                                                                                                                                                                                                                                                                                                                                                                      | Laboratório de Ecologia de Doenças Transmissíveis na Amazonia, Instituto Leonidas e Maria Deane - Fiocruz Amazonia | Laboratório de Ecologia de Doenças Transmissíveis na Amazonia, Instituto Leonidas e Maria Deane - Fiocruz Amazonia | Valdinete Nascimento, Victor Souza, André Corado, Fernanda Nascimento, George Silva, Ágatha Costa, Debora Duarte, Luciana Gonçalves, Matilde Mejía, Karina Pessoa, Maria Júlia Brandão, Michele Jesus, Felipe Naveca on behalf of the Fiocruz COVID-19 Genomic Surveillance Network |
| EPI_ISL_833136, EPI_ISL_833137, EPI_ISL_833138, EPI_ISL_833139, EPI_ISL_833140                                                                                                                                                                                                                                                                                                                                                                                                                                                                                                                                                                                                                                                                                                                                                                                                                                                      | Laboratório de Ecologia de Doenças Transmissíveis na Amazonia, Instituto Leonidas e Maria Deane - Fiocruz Amazonia | Laboratório de Ecologia de Doenças Transmissíveis na Amazonia, Instituto Leonidas e Maria Deane - Fiocruz Amazonia | Valdinete Nascimento, Victor Souza, André Corado, Fernanda Nascimento, George Silva, Ágatha Costa, Debora Duarte, Karina Pessoa, Matilde Mejía, Luciana Gonçalves, Maria Júlia Brandão, Michele Jesus, Felipe Naveca on behalf of the Fiocruz COVID-19 Genomic Surveillance Network |
| EPI_ISL_833167, EPI_ISL_833169, EPI_ISL_833170, EPI_ISL_833171, EPI_ISL_833172, EPI_ISL_833173, EPI_ISL_833174                                                                                                                                                                                                                                                                                                                                                                                                                                                                                                                                                                                                                                                                                                                                                                                                                      | DB Diagnosticos do Brasil                                                                                          | Instituto Adolfo Lutz, Interdisciplinary Procedures Center, Strategic Laboratory                                   | Claudio Tavares Sacchi, Claudia Regina Gonçalves, Erica Valessa Ramos Gomes, Karoline Rodrigues Campos                                                                                                                                                                              |
| EPI_ISL_872191, EPI_ISL_872192                                                                                                                                                                                                                                                                                                                                                                                                                                                                                                                                                                                                                                                                                                                                                                                                                                                                                                      | Conjunto Hospitalar do Mandaqui de Sao Paulo                                                                       | Instituto Adolfo Lutz, Interdisciplinary Procedures Center, Strategic Laboratory                                   | Claudio Tavares Sacchi, Claudia Regina Gonçalves, Erica Valessa Ramos Gomes, Karoline Rodrigues Campos, Katia Correa de Oliveira Santos, Ana Lucia de Carvalho Avelino, Fabiana Cristina Pereira dos Santos                                                                         |
| EPI_ISL_875688                                                                                                                                                                                                                                                                                                                                                                                                                                                                                                                                                                                                                                                                                                                                                                                                                                                                                                                      | National Influenza Center - Instituto Adolfo Lutz                                                                  | Instituto Adolfo Lutz, Interdisciplinary Procedures Center, Strategic Laboratory                                   | Claudio Tavares Sacchi, Claudia Regina Gonçalves, Erica Valessa Ramos Gomes, Karoline Rodrigues Campos, Katia Correa de Oliveira Santos, Ana Lucia de Carvalho Avelino, Clovis Roberto Abe Constantino                                                                              |
| EPI_ISL_875689                                                                                                                                                                                                                                                                                                                                                                                                                                                                                                                                                                                                                                                                                                                                                                                                                                                                                                                      | Hospital do Servidor Publico                                                                                       | Instituto Adolfo Lutz, Interdisciplinary Procedures Center, Strategic Laboratory                                   | Claudio Tavares Sacchi, Claudia Regina Gonçalves, Erica Valessa Ramos Gomes, Karoline Rodrigues Campos                                                                                                                                                                              |
| EPI_ISL_904120, EPI_ISL_904121                                                                                                                                                                                                                                                                                                                                                                                                                                                                                                                                                                                                                                                                                                                                                                                                                                                                                                      | LACEN - Laboratório Central de Saúde Pública do Pará                                                               | Evandro Chagas Institute                                                                                           | Santos, M.C.; Silva, A.M.; Junior, W.D.C.; Barbagelata, L.S.; Ferreira, J.A.; Sousa, E.M.A.; da Silva, P.S.; Pinheiro, K.C.; L.C.; Sousa Junior, E.C.                                                                                                                               |
| EPI_ISL_906068, EPI_ISL_906069                                                                                                                                                                                                                                                                                                                                                                                                                                                                                                                                                                                                                                                                                                                                                                                                                                                                                                      | Instituto Adolfo Lutz - Regional de Campinas                                                                       | Instituto Adolfo Lutz, Interdisciplinary Procedures Center, Strategic Laboratory                                   | Claudio Tavares Sacchi, Claudia Regina Gonçalves, Erica Valessa Ramos Gomes, Karoline Rodrigues Campos                                                                                                                                                                              |
| EPI_ISL_906071                                                                                                                                                                                                                                                                                                                                                                                                                                                                                                                                                                                                                                                                                                                                                                                                                                                                                                                      | LACEN-PI DR. Costa Alvarenga                                                                                       | Instituto Adolfo Lutz, Interdisciplinary Procedures Center,                                                        | Claudio Tavares Sacchi, Claudia Regina Gonçalves, Erica Valessa Ramos Gomes, Karoline Rodrigues Campos                                                                                                                                                                              |

| Strategic Laboratory                                                                                                                                                                                                                           |                                                                                          |                                                                                                               |                                                                                                                                                       |
|------------------------------------------------------------------------------------------------------------------------------------------------------------------------------------------------------------------------------------------------|------------------------------------------------------------------------------------------|---------------------------------------------------------------------------------------------------------------|-------------------------------------------------------------------------------------------------------------------------------------------------------|
| EPI_ISL_906075                                                                                                                                                                                                                                 | Hospital Geral de Vila Pentead Dr Jose Pangella Sao Paulo                                | Instituto Adolfo Lutz, Interdisciplinary Procedures Center, Strategic Laboratory                              | Claudio Tavares Sacchi, Claudia Regina Gonçalves, Erica Valessa Ramos Gomes, Karoline Rodrigues Campos                                                |
| EPI_ISL_906076, EPI_ISL_906077                                                                                                                                                                                                                 | Hospital Sao Luiz Sao Caetano                                                            | Instituto Adolfo Lutz, Interdisciplinary Procedures Center, Strategic Laboratory                              | Claudio Tavares Sacchi, Claudia Regina Gonçalves, Erica Valessa Ramos Gomes, Karoline Rodrigues Campos                                                |
| EPI_ISL_906080, EPI_ISL_906081                                                                                                                                                                                                                 | Hospital Beneficiencia Portuguesa                                                        | Instituto Adolfo Lutz, Interdisciplinary Procedures Center, Strategic Laboratory                              | Claudio Tavares Sacchi, Claudia Regina Gonçalves, Erica Valessa Ramos Gomes, Karoline Rodrigues Campos                                                |
| EPI_ISL_918499, EPI_ISL_918500, EPI_ISL_918501, EPI_ISL_918502, EPI_ISL_918503, EPI_ISL_918504, EPI_ISL_918505, EPI_ISL_918506, EPI_ISL_918507, EPI_ISL_918508, EPI_ISL_918509, EPI_ISL_918510, EPI_ISL_918511                                 | see above                                                                                | Evandro Chagas Institute                                                                                      | Santos, M.C.; Silva, A.M.; Junior, W.D.C.; Barbagelata, L.S.; Ferreira, J.A.; Sousa, E.M.A.; da Silva, P.S.; Pinheiro, K.C.; L.C.; Sousa Junior, E.C. |
| EPI_ISL_940614, EPI_ISL_940615, EPI_ISL_940616, EPI_ISL_940617, EPI_ISL_940618                                                                                                                                                                 | LACEN - Laboratório Central de Saúde Pública do Amazonas<br>LACEN-PI DR. Costa Alvarenga | Instituto Adolfo Lutz, Interdisciplinary Procedures Center, Strategic Laboratory                              | Claudio Tavares Sacchi, Claudia Regina Gonçalves, Erica Valessa Ramos Gomes, Karoline Rodrigues Campos                                                |
| EPI_ISL_940619, EPI_ISL_940620, EPI_ISL_940621, EPI_ISL_940622, EPI_ISL_940623, EPI_ISL_940624, EPI_ISL_940625                                                                                                                                 | Hospital Sao Joaquim - Beneficiencia Portuguesa                                          | Instituto Adolfo Lutz, Interdisciplinary Procedures Center, Strategic Laboratory                              | Claudio Tavares Sacchi, Claudia Regina Gonçalves, Erica Valessa Ramos Gomes, Karoline Rodrigues Campos                                                |
| EPI_ISL_940626, EPI_ISL_940627                                                                                                                                                                                                                 | Hospital Central Sao Caetano do Sul                                                      | Instituto Adolfo Lutz, Interdisciplinary Procedures Center, Strategic Laboratory                              | Claudio Tavares Sacchi, Claudia Regina Gonçalves, Erica Valessa Ramos Gomes, Karoline Rodrigues Campos                                                |
| EPI_ISL_940630, EPI_ISL_943967, EPI_ISL_943968, EPI_ISL_943969, EPI_ISL_943970, EPI_ISL_943971                                                                                                                                                 | Hospital Geral de Sao Paulo                                                              | Instituto Adolfo Lutz, Interdisciplinary Procedures Center, Strategic Laboratory                              | Claudio Tavares Sacchi, Claudia Regina Gonçalves, Erica Valessa Ramos Gomes, Karoline Rodrigues Campos                                                |
| EPI_ISL_943987                                                                                                                                                                                                                                 | LACEN do Estado de Tocantins                                                             | Instituto Adolfo Lutz, Interdisciplinary Procedures Center, Strategic Laboratory                              | Claudio Tavares Sacchi, Claudia Regina Gonçalves, Erica Valessa Ramos Gomes, Karoline Rodrigues Campos                                                |
| EPI_ISL_943990                                                                                                                                                                                                                                 | LACEN do Estado de Goias                                                                 | Instituto Adolfo Lutz, Interdisciplinary Procedures Center, Strategic Laboratory                              | Claudio Tavares Sacchi, Claudia Regina Gonçalves, Erica Valessa Ramos Gomes, Karoline Rodrigues Campos                                                |
| EPI_ISL_981383, EPI_ISL_981385, EPI_ISL_981387                                                                                                                                                                                                 | IAL Regional de Bauru                                                                    | Instituto Adolfo Lutz, Interdisciplinary Procedures Center, Strategic Laboratory                              | Claudio Tavares Sacchi, Claudia Regina Gonçalves, Erica Valessa Ramos Gomes, Karoline Rodrigues Campos                                                |
| EPI_ISL_983865, EPI_ISL_984619, EPI_ISL_984620, EPI_ISL_984621                                                                                                                                                                                 | Central Laboratory of Public Health of Rio Grande do Sul (Lacen-RS)                      | State Center for Health Surveillance of the Health Department of the State of Rio Grande do Sul (CEVS/SES-RS) | Aline Campos, Cynthia Molina, Lara Crescente, Leticia Garay, Ludmila Fiorenzano Baethgen, Richard Salvato, Tatiana Gregianini                         |
| EPI_ISL_985303, EPI_ISL_985304, EPI_ISL_985305, EPI_ISL_985306, EPI_ISL_985307, EPI_ISL_985308, EPI_ISL_985309, EPI_ISL_985310, EPI_ISL_985311, EPI_ISL_985312, EPI_ISL_985313, EPI_ISL_985314, EPI_ISL_985315, EPI_ISL_985316, EPI_ISL_985317 | see above                                                                                | LACEN do Estado de Goias                                                                                      | Claudio Tavares Sacchi, Claudia Regina Gonçalves, Erica Valessa Ramos Gomes, Karoline Rodrigues Campos                                                |
| EPI_ISL_985318, EPI_ISL_985319                                                                                                                                                                                                                 | LACEN de Santa Catarina                                                                  | Instituto Adolfo Lutz, Interdisciplinary Procedures Center, Strategic Laboratory                              | Claudio Tavares Sacchi, Claudia Regina Gonçalves, Erica Valessa Ramos Gomes, Karoline Rodrigues Campos                                                |
