# Supplementary material for: Spatiotemporal dissemination pattern of SARS-CoV-2 B1.1.28-derived lineages introduced into Uruguay across its southeastern border with Brazil
Source: bioRxiv or medRxiv preprint supplement (doi:10.1101/2021.07.05.21259760), 2021-07-07
Supplement: Supplementary file [file media-9.pdf]

We gratefully acknowledge the following Authors from the Originating laboratories responsible for obtaining the specimens, as well as the Submitting laboratories where the genome data were generated and shared via GISAID, on which this research is based.

All Submitters of data may be contacted directly via [www.gisaid.org](http://www.gisaid.org)

Authors are sorted alphabetically.

| Accession ID                                                                                                                                                                                               | Originating Laboratory                                                         | Submitting Laboratory                                                            | Authors                                                                                                                                                                                                                                                 |
|------------------------------------------------------------------------------------------------------------------------------------------------------------------------------------------------------------|--------------------------------------------------------------------------------|----------------------------------------------------------------------------------|---------------------------------------------------------------------------------------------------------------------------------------------------------------------------------------------------------------------------------------------------------|
| EPI_ISL_1121316                                                                                                                                                                                            | LACEN do Rio Grande do Sul                                                     | Instituto Adolfo Lutz, Interdisciplinary Procedures Center, Strategic Laboratory | Claudio Tavares Sacchi, Claudia Regina Gonçalves, Erica Valessa Ramos Gomes, Karoline Rodrigues Campos, Caio Vinicius Dias Lopes                                                                                                                        |
| EPI_ISL_1181411, EPI_ISL_1181433, EPI_ISL_1181434, EPI_ISL_1181451                                                                                                                                         | Laboratório Central de Saúde Pública do Estado do Rio Grande do Sul (LACEN-RS) | Laboratory of Respiratory Viruses and Measles, Oswaldo Cruz Institute, FIOCRUZ   | Paola Resende, Luciana Appolinário, Fernando Motta, Ana Carolina Paixao, Ana Carolina Mendonca, Alice Sampaio Rocha, Renata Serrano Lopes, Tatiana Schaffer Gregianini, Marilda Siqueira on behalf of the Fiocruz COVID-19 Genomic Surveillance Network |
| EPI_ISL_1182547, EPI_ISL_1182597, EPI_ISL_1182599, EPI_ISL_1182605, EPI_ISL_1182606, EPI_ISL_1182608, EPI_ISL_1182610, EPI_ISL_1182616, EPI_ISL_1182619, EPI_ISL_1182620, EPI_ISL_1182621, EPI_ISL_1182623 | Laboratório Central de Saúde Pública do Rio Grande do Sul                      | Coordenação Geral de Laboratórios de Saúde Pública (CGLAB/DAEVS/SVMS)            | Vagner Fonseca, et al.                                                                                                                                                                                                                                  |
| see above                                                                                                                                                                                                  | Laboratório Central de Saúde Pública do Rio Grande do Sul                      | Coordenação Geral de Laboratórios de Saúde Pública (CGLAB/DAEVS/SVMS)            | Vagner Fonseca, et al.                                                                                                                                                                                                                                  |
| EPI_ISL_1195275, EPI_ISL_1195276                                                                                                                                                                           | CENTRO DE REFERENCIA EM SINDROMES GRIPAIS                                      | Epiclin                                                                          | Fernando Hayashi Sant'Anna, Ana Paula Muterle, Janira Prichula, Juliana Comerlato, Carolina Comerlato, Eliana Márcia Da Ros Wendland                                                                                                                    |
| EPI_ISL_1195277                                                                                                                                                                                            | Unidade de Atendimento DST AIDS TB e Han                                       | Epiclin                                                                          | Fernando Hayashi Sant'Anna, Ana Paula Muterle, Janira Prichula, Juliana Comerlato, Carolina Comerlato, Eliana Márcia Da Ros Wendland                                                                                                                    |
| EPI_ISL_1195278                                                                                                                                                                                            | DIRETORIA DE VIGILANCIA EM SAUDE                                               | Epiclin                                                                          | Fernando Hayashi Sant'Anna, Ana Paula Muterle, Janira Prichula, Juliana Comerlato, Carolina Comerlato, Eliana Márcia Da Ros Wendland                                                                                                                    |
| EPI_ISL_1195279                                                                                                                                                                                            | CENTRO DE REFERENCIA EM SINDROMES GRIPAIS                                      | Epiclin                                                                          | Fernando Hayashi Sant'Anna, Ana Paula Muterle, Janira Prichula, Juliana Comerlato, Carolina Comerlato, Eliana Márcia Da Ros Wendland                                                                                                                    |
| EPI_ISL_1195280                                                                                                                                                                                            | SECRETARIA MUNICIPAL DE SAUDE DE ARARICA                                       | Epiclin                                                                          | Fernando Hayashi Sant'Anna, Ana Paula Muterle, Janira Prichula, Juliana Comerlato, Carolina Comerlato, Eliana Márcia Da Ros Wendland                                                                                                                    |
| EPI_ISL_1195281                                                                                                                                                                                            | FUNDACAO DE SAUDE PUBLICA SAO CAMILO DE ESTEIO                                 | Epiclin                                                                          | Fernando Hayashi Sant'Anna, Ana Paula Muterle, Janira Prichula, Juliana Comerlato, Carolina Comerlato, Eliana Márcia Da Ros Wendland                                                                                                                    |
| EPI_ISL_1195282                                                                                                                                                                                            | UNIDADE SANITARIA DE IGREJINHA                                                 | Epiclin                                                                          | Fernando Hayashi Sant'Anna, Ana Paula Muterle, Janira Prichula, Juliana Comerlato, Carolina Comerlato, Eliana Márcia Da Ros Wendland                                                                                                                    |
| EPI_ISL_1195283                                                                                                                                                                                            | SECRETARIA MUNICIPAL DE SAUDE DE TRES COROAS                                   | Epiclin                                                                          | Fernando Hayashi Sant'Anna, Ana Paula Muterle, Janira Prichula, Juliana Comerlato, Carolina Comerlato, Eliana Márcia Da Ros Wendland                                                                                                                    |
| EPI_ISL_1195284                                                                                                                                                                                            | Centro de Especialidades Triunfo                                               | Epiclin                                                                          | Fernando Hayashi Sant'Anna, Ana Paula Muterle, Janira Prichula, Juliana Comerlato, Carolina Comerlato, Eliana Márcia Da Ros Wendland                                                                                                                    |
| EPI_ISL_1195285, EPI_ISL_1195286                                                                                                                                                                           | SECRETARIA MUNICIPAL DE SAUDE DE TRES COROAS                                   | Epiclin                                                                          | Fernando Hayashi Sant'Anna, Ana Paula Muterle, Janira Prichula, Juliana Comerlato, Carolina Comerlato, Eliana Márcia Da Ros Wendland                                                                                                                    |
| EPI_ISL_1195287                                                                                                                                                                                            | SECRETARIA MUNICIPAL DE SAUDE DE SAO LEOPOLDO                                  | Epiclin                                                                          | Fernando Hayashi Sant'Anna, Ana Paula Muterle, Janira Prichula, Juliana Comerlato, Carolina Comerlato, Eliana Márcia Da Ros Wendland                                                                                                                    |
| EPI_ISL_1195288                                                                                                                                                                                            | DIRETORIA DE VIGILANCIA EM SAUDE                                               | Epiclin                                                                          | Fernando Hayashi Sant'Anna, Ana Paula Muterle, Janira Prichula, Juliana Comerlato, Carolina Comerlato, Eliana Márcia Da Ros Wendland                                                                                                                    |
| EPI_ISL_1195289                                                                                                                                                                                            | SECRETARIA MUNICIPAL DE SAUDE DE SAO LEOPOLDO                                  | Epiclin                                                                          | Fernando Hayashi Sant'Anna, Ana Paula Muterle, Janira Prichula, Juliana Comerlato, Carolina Comerlato, Eliana Márcia Da Ros Wendland                                                                                                                    |
| EPI_ISL_1195290                                                                                                                                                                                            | SECRETARIA MUNICIPAL DE SAUDE DE TRES COROAS                                   | Epiclin                                                                          | Fernando Hayashi Sant'Anna, Ana Paula Muterle, Janira Prichula, Juliana Comerlato, Carolina Comerlato, Eliana Márcia Da Ros Wendland                                                                                                                    |
| EPI_ISL_1195291                                                                                                                                                                                            | DIRETORIA DE VIGILANCIA EM SAUDE                                               | Epiclin                                                                          | Fernando Hayashi Sant'Anna, Ana Paula Muterle, Janira Prichula, Juliana Comerlato, Carolina Comerlato, Eliana Márcia Da Ros Wendland                                                                                                                    |
| EPI_ISL_1195292                                                                                                                                                                                            | SECRETARIA MUNICIPAL DE SAUDE DE TRES COROAS                                   | Epiclin                                                                          | Fernando Hayashi Sant'Anna, Ana Paula Muterle, Janira Prichula, Juliana Comerlato, Carolina Comerlato, Eliana Márcia Da Ros Wendland                                                                                                                    |
| EPI_ISL_1195293                                                                                                                                                                                            | SECRETARIA MUNICIPAL DE SAUDE DE TAQUARA                                       | Epiclin                                                                          | Fernando Hayashi Sant'Anna, Ana Paula Muterle, Janira Prichula, Juliana Comerlato, Carolina Comerlato, Eliana Márcia Da Ros Wendland                                                                                                                    |
| EPI_ISL_1469549                                                                                                                                                                                            | FUNDACAO HOSPITALAR DE SAPUCAIA DO SUL                                         | Epiclin                                                                          | Fernando Hayashi Sant'Anna, Ana Paula Muterle, Janira Prichula, Juliana Comerlato, Carolina Comerlato, Eliana Márcia Da Ros Wendland                                                                                                                    |
| EPI_ISL_1469555                                                                                                                                                                                            | FUNDACAO DE SAUDE PUBLICA DE NOVO HAMBURGO FSNH                                | Epiclin                                                                          | Fernando Hayashi Sant'Anna, Ana Paula Muterle, Janira Prichula, Juliana Comerlato, Carolina Comerlato, Eliana Márcia Da Ros Wendland                                                                                                                    |
| EPI_ISL_1469558, EPI_ISL_1469566                                                                                                                                                                           | DIRETORIA DE VIGILANCIA EM SAUDE                                               | Epiclin                                                                          | Fernando Hayashi Sant'Anna, Ana Paula Muterle, Janira Prichula, Juliana Comerlato, Carolina Comerlato, Eliana Márcia Da Ros Wendland                                                                                                                    |
| EPI_ISL_1469568                                                                                                                                                                                            | SECRETARIA MUNICIPAL DE SAUDE DE SAO LEOPOLDO                                  | Epiclin                                                                          | Fernando Hayashi Sant'Anna, Ana Paula Muterle, Janira Prichula, Juliana Comerlato, Carolina Comerlato, Eliana Márcia Da Ros Wendland                                                                                                                    |
| EPI_ISL_1469572                                                                                                                                                                                            | FUNDACAO DE SAUDE PUBLICA DE NOVO HAMBURGO FSNH                                | Epiclin                                                                          | Fernando Hayashi Sant'Anna, Ana Paula Muterle, Janira Prichula, Juliana Comerlato, Carolina Comerlato, Eliana Márcia Da Ros Wendland                                                                                                                    |
| EPI_ISL_1469573                                                                                                                                                                                            | VIGILANCIA EM SAUDE NH                                                         | Epiclin                                                                          | Fernando Hayashi Sant'Anna, Ana Paula Muterle, Janira Prichula, Juliana Comerlato, Carolina Comerlato, Eliana Márcia Da Ros Wendland                                                                                                                    |
| EPI_ISL_1469578                                                                                                                                                                                            | HOSPITAL SAO FRANCISCO DE ASSIS                                                | Epiclin                                                                          | Fernando Hayashi Sant'Anna, Ana Paula Muterle, Janira Prichula, Juliana Comerlato, Carolina Comerlato, Eliana Márcia Da Ros Wendland                                                                                                                    |
| EPI_ISL_1469579                                                                                                                                                                                            | DIRETORIA DE VIGILANCIA EM SAUDE                                               | Epiclin                                                                          | Fernando Hayashi Sant'Anna, Ana Paula Muterle, Janira Prichula, Juliana Comerlato, Carolina Comerlato, Eliana Márcia Da Ros Wendland                                                                                                                    |
| EPI_ISL_1469583                                                                                                                                                                                            | UNIDADE SANITARIA DE IGREJINHA                                                 | Epiclin                                                                          | Fernando Hayashi Sant'Anna, Ana Paula Muterle, Janira Prichula, Juliana Comerlato, Carolina Comerlato, Eliana Márcia Da Ros Wendland                                                                                                                    |
| EPI_ISL_1469584                                                                                                                                                                                            | CENTRO MUNICIPAL DE SAUDE DE ROLANTE                                           | Epiclin                                                                          | Fernando Hayashi Sant'Anna, Ana Paula Muterle, Janira Prichula, Juliana Comerlato, Carolina Comerlato, Eliana Márcia Da Ros Wendland                                                                                                                    |
| EPI_ISL_1469586                                                                                                                                                                                            | FUNDACAO HOSPITALAR SAO JOSE                                                   | Epiclin                                                                          | Fernando Hayashi Sant'Anna, Ana Paula Muterle, Janira Prichula, Juliana Comerlato, Carolina Comerlato, Eliana Márcia Da Ros Wendland                                                                                                                    |
| EPI_ISL_1469589                                                                                                                                                                                            | UNIDADE DE PRONTO ATENDIMENTO DE SAPUCAIA DO SUL UPA                           | Epiclin                                                                          | Fernando Hayashi Sant'Anna, Ana Paula Muterle, Janira Prichula, Juliana Comerlato, Carolina Comerlato, Eliana Márcia Da Ros Wendland                                                                                                                    |
| EPI_ISL_1469590                                                                                                                                                                                            | DIRETORIA DE VIGILANCIA EM SAUDE                                               | Epiclin                                                                          | Fernando Hayashi Sant'Anna, Ana Paula Muterle, Janira Prichula, Juliana Comerlato, Carolina Comerlato, Eliana Márcia Da Ros Wendland                                                                                                                    |
| EPI_ISL_1469592                                                                                                                                                                                            | Diretoria de Vigilância em Saúde                                               | Epiclin                                                                          | Fernando Hayashi Sant'Anna, Ana Paula Muterle, Janira Prichula, Juliana Comerlato, Carolina Comerlato, Eliana Márcia Da Ros Wendland                                                                                                                    |
| EPI_ISL_1469594                                                                                                                                                                                            | DIRETORIA DE VIGILANCIA EM SAUDE                                               | Epiclin                                                                          | Fernando Hayashi Sant'Anna, Ana Paula Muterle, Janira Prichula, Juliana Comerlato, Carolina Comerlato, Eliana Márcia Da Ros Wendland                                                                                                                    |
| EPI_ISL_1469596                                                                                                                                                                                            | CENTRO DE REFERENCIA EM SINDROMES GRIPAIS                                      | Epiclin                                                                          | Fernando Hayashi Sant'Anna, Ana Paula Muterle, Janira Prichula, Juliana Comerlato, Carolina Comerlato, Eliana Márcia Da Ros Wendland                                                                                                                    |
| EPI_ISL_1469601                                                                                                                                                                                            | SECRETARIA MUNICIPAL DE SAUDE DE TAQUARA                                       | Epiclin                                                                          | Fernando Hayashi Sant'Anna, Ana Paula Muterle, Janira Prichula, Juliana Comerlato, Carolina Comerlato, Eliana Márcia Da Ros Wendland                                                                                                                    |
| EPI_ISL_1469603                                                                                                                                                                                            | Centro de Referência em Síndromes Gripais                                      | Epiclin                                                                          | Fernando Hayashi Sant'Anna, Ana Paula Muterle, Janira Prichula, Juliana Comerlato, Carolina Comerlato, Eliana Márcia Da Ros Wendland                                                                                                                    |
| EPI_ISL_1469604, EPI_ISL_1469608                                                                                                                                                                           | COORDENADORIA GERAL DE VIGILANCIA EM SAUDE                                     | Epiclin                                                                          | Fernando Hayashi Sant'Anna, Ana Paula Muterle, Janira Prichula, Juliana Comerlato, Carolina Comerlato, Eliana Márcia Da Ros Wendland                                                                                                                    |
| EPI_ISL_1469611                                                                                                                                                                                            | DIRETORIA DE VIGILANCIA EM SAUDE                                               | Epiclin                                                                          | Fernando Hayashi Sant'Anna, Ana Paula Muterle, Janira Prichula, Juliana Comerlato, Carolina Comerlato, Eliana Márcia Da Ros Wendland                                                                                                                    |
| EPI_ISL_1469612, EPI_ISL_1469620                                                                                                                                                                           | FUNDACAO DE SAUDE PUBLICA DE NOVO HAMBURGO FSNH                                | Epiclin                                                                          | Fernando Hayashi Sant'Anna, Ana Paula Muterle, Janira Prichula, Juliana Comerlato, Carolina Comerlato, Eliana Márcia Da Ros Wendland                                                                                                                    |
| EPI_ISL_1469624                                                                                                                                                                                            | HOSPITAL MUNICIPAL GETULIO VARGAS                                              | Epiclin                                                                          | Fernando Hayashi Sant'Anna, Ana Paula Muterle, Janira Prichula, Juliana Comerlato, Carolina Comerlato, Eliana Márcia Da Ros Wendland                                                                                                                    |
| EPI_ISL_1469628                                                                                                                                                                                            | CENTRO DE SERVICOS ESPECIALIZADOS SANTA RITA DE CASSIA                         | Epiclin                                                                          | Fernando Hayashi Sant'Anna, Ana Paula Muterle, Janira Prichula, Juliana Comerlato, Carolina Comerlato, Eliana Márcia Da Ros Wendland                                                                                                                    |
| EPI_ISL_1469629                                                                                                                                                                                            | CENTRO MUNICIPAL DE SAUDE DE ROLANTE                                           | Epiclin                                                                          | Fernando Hayashi Sant'Anna, Ana Paula Muterle, Janira Prichula, Juliana Comerlato, Carolina Comerlato, Eliana Márcia Da Ros Wendland                                                                                                                    |



|                                                                                                                                                                                                                                                                                                                                                                                                                                                                                                                                                                                                                                                                                                                                                                                                                                                                                                                                                                                                                                                                                                                                                                                                                                                                                                                                                                                                                                                                                                                                                                |                                                                                |                                                                                                               |                                                                                                                                                                                                                                                                                                                                                                                                                                                                                |
|----------------------------------------------------------------------------------------------------------------------------------------------------------------------------------------------------------------------------------------------------------------------------------------------------------------------------------------------------------------------------------------------------------------------------------------------------------------------------------------------------------------------------------------------------------------------------------------------------------------------------------------------------------------------------------------------------------------------------------------------------------------------------------------------------------------------------------------------------------------------------------------------------------------------------------------------------------------------------------------------------------------------------------------------------------------------------------------------------------------------------------------------------------------------------------------------------------------------------------------------------------------------------------------------------------------------------------------------------------------------------------------------------------------------------------------------------------------------------------------------------------------------------------------------------------------|--------------------------------------------------------------------------------|---------------------------------------------------------------------------------------------------------------|--------------------------------------------------------------------------------------------------------------------------------------------------------------------------------------------------------------------------------------------------------------------------------------------------------------------------------------------------------------------------------------------------------------------------------------------------------------------------------|
| EPI_ISL_1469732                                                                                                                                                                                                                                                                                                                                                                                                                                                                                                                                                                                                                                                                                                                                                                                                                                                                                                                                                                                                                                                                                                                                                                                                                                                                                                                                                                                                                                                                                                                                                | CENTRO DE REFERENCIA EM SINDROMES GRIPAIS                                      | Epiclin                                                                                                       | Fernando Hayashi Sant'Anna, Ana Paula Muterle, Janira Prichula, Juliana Comerlato, Carolina Comerlato, Eliana Márcia Da Ros Wendland                                                                                                                                                                                                                                                                                                                                           |
| EPI_ISL_1469733                                                                                                                                                                                                                                                                                                                                                                                                                                                                                                                                                                                                                                                                                                                                                                                                                                                                                                                                                                                                                                                                                                                                                                                                                                                                                                                                                                                                                                                                                                                                                | UNIDADE DE PRONTO ATENDIMENTO DE SAPUCAIA DO SUL UPA                           | Epiclin                                                                                                       | Fernando Hayashi Sant'Anna, Ana Paula Muterle, Janira Prichula, Juliana Comerlato, Carolina Comerlato, Eliana Márcia Da Ros Wendland                                                                                                                                                                                                                                                                                                                                           |
| EPI_ISL_1469737                                                                                                                                                                                                                                                                                                                                                                                                                                                                                                                                                                                                                                                                                                                                                                                                                                                                                                                                                                                                                                                                                                                                                                                                                                                                                                                                                                                                                                                                                                                                                | CENTRO DE REFERENCIA EM SINDROMES GRIPAIS                                      | Epiclin                                                                                                       | Fernando Hayashi Sant'Anna, Ana Paula Muterle, Janira Prichula, Juliana Comerlato, Carolina Comerlato, Eliana Márcia Da Ros Wendland                                                                                                                                                                                                                                                                                                                                           |
| EPI_ISL_1469740                                                                                                                                                                                                                                                                                                                                                                                                                                                                                                                                                                                                                                                                                                                                                                                                                                                                                                                                                                                                                                                                                                                                                                                                                                                                                                                                                                                                                                                                                                                                                | SECRETARIA MUNICIPAL DE SAUDE DE TRES COROAS                                   | Epiclin                                                                                                       | Fernando Hayashi Sant'Anna, Ana Paula Muterle, Janira Prichula, Juliana Comerlato, Carolina Comerlato, Eliana Márcia Da Ros Wendland                                                                                                                                                                                                                                                                                                                                           |
| EPI_ISL_1469742                                                                                                                                                                                                                                                                                                                                                                                                                                                                                                                                                                                                                                                                                                                                                                                                                                                                                                                                                                                                                                                                                                                                                                                                                                                                                                                                                                                                                                                                                                                                                | CENTRO DE REFERENCIA EM SINDROMES GRIPAIS                                      | Epiclin                                                                                                       | Fernando Hayashi Sant'Anna, Ana Paula Muterle, Janira Prichula, Juliana Comerlato, Carolina Comerlato, Eliana Márcia Da Ros Wendland                                                                                                                                                                                                                                                                                                                                           |
| EPI_ISL_1469743                                                                                                                                                                                                                                                                                                                                                                                                                                                                                                                                                                                                                                                                                                                                                                                                                                                                                                                                                                                                                                                                                                                                                                                                                                                                                                                                                                                                                                                                                                                                                | DIRETORIA DE VIGILANCIA EM SAUDE                                               | Epiclin                                                                                                       | Fernando Hayashi Sant'Anna, Ana Paula Muterle, Janira Prichula, Juliana Comerlato, Carolina Comerlato, Eliana Márcia Da Ros Wendland                                                                                                                                                                                                                                                                                                                                           |
| EPI_ISL_1469744                                                                                                                                                                                                                                                                                                                                                                                                                                                                                                                                                                                                                                                                                                                                                                                                                                                                                                                                                                                                                                                                                                                                                                                                                                                                                                                                                                                                                                                                                                                                                | HOSPITAL SAO FRANCISCO DE ASSIS                                                | Epiclin                                                                                                       | Fernando Hayashi Sant'Anna, Ana Paula Muterle, Janira Prichula, Juliana Comerlato, Carolina Comerlato, Eliana Márcia Da Ros Wendland                                                                                                                                                                                                                                                                                                                                           |
| EPI_ISL_1469746                                                                                                                                                                                                                                                                                                                                                                                                                                                                                                                                                                                                                                                                                                                                                                                                                                                                                                                                                                                                                                                                                                                                                                                                                                                                                                                                                                                                                                                                                                                                                | HOSPITAL MONTENEGRO                                                            | Epiclin                                                                                                       | Fernando Hayashi Sant'Anna, Ana Paula Muterle, Janira Prichula, Juliana Comerlato, Carolina Comerlato, Eliana Márcia Da Ros Wendland                                                                                                                                                                                                                                                                                                                                           |
| EPI_ISL_1469751                                                                                                                                                                                                                                                                                                                                                                                                                                                                                                                                                                                                                                                                                                                                                                                                                                                                                                                                                                                                                                                                                                                                                                                                                                                                                                                                                                                                                                                                                                                                                | UNIDADE BASICA DE SAUDE DE RIOZINHO                                            | Epiclin                                                                                                       | Fernando Hayashi Sant'Anna, Ana Paula Muterle, Janira Prichula, Juliana Comerlato, Carolina Comerlato, Eliana Márcia Da Ros Wendland                                                                                                                                                                                                                                                                                                                                           |
| EPI_ISL_1469753                                                                                                                                                                                                                                                                                                                                                                                                                                                                                                                                                                                                                                                                                                                                                                                                                                                                                                                                                                                                                                                                                                                                                                                                                                                                                                                                                                                                                                                                                                                                                | Diretoria de Vigilância em Saúde                                               | Epiclin                                                                                                       | Fernando Hayashi Sant'Anna, Ana Paula Muterle, Janira Prichula, Juliana Comerlato, Carolina Comerlato, Eliana Márcia Da Ros Wendland                                                                                                                                                                                                                                                                                                                                           |
| EPI_ISL_1469754                                                                                                                                                                                                                                                                                                                                                                                                                                                                                                                                                                                                                                                                                                                                                                                                                                                                                                                                                                                                                                                                                                                                                                                                                                                                                                                                                                                                                                                                                                                                                | Hospital Municipal Getúlio Vargas                                              | Epiclin                                                                                                       | Fernando Hayashi Sant'Anna, Ana Paula Muterle, Janira Prichula, Juliana Comerlato, Carolina Comerlato, Eliana Márcia Da Ros Wendland                                                                                                                                                                                                                                                                                                                                           |
| EPI_ISL_1469757                                                                                                                                                                                                                                                                                                                                                                                                                                                                                                                                                                                                                                                                                                                                                                                                                                                                                                                                                                                                                                                                                                                                                                                                                                                                                                                                                                                                                                                                                                                                                | Secretaria Municipal de Saúde de São Leopoldo                                  | Epiclin                                                                                                       | Fernando Hayashi Sant'Anna, Ana Paula Muterle, Janira Prichula, Juliana Comerlato, Carolina Comerlato, Eliana Márcia Da Ros Wendland                                                                                                                                                                                                                                                                                                                                           |
| EPI_ISL_1469759                                                                                                                                                                                                                                                                                                                                                                                                                                                                                                                                                                                                                                                                                                                                                                                                                                                                                                                                                                                                                                                                                                                                                                                                                                                                                                                                                                                                                                                                                                                                                | HOSPITAL MUNICIPAL GETULIO VARGAS                                              | Epiclin                                                                                                       | Fernando Hayashi Sant'Anna, Ana Paula Muterle, Janira Prichula, Juliana Comerlato, Carolina Comerlato, Eliana Márcia Da Ros Wendland                                                                                                                                                                                                                                                                                                                                           |
| EPI_ISL_1469760                                                                                                                                                                                                                                                                                                                                                                                                                                                                                                                                                                                                                                                                                                                                                                                                                                                                                                                                                                                                                                                                                                                                                                                                                                                                                                                                                                                                                                                                                                                                                | DIRETORIA DE VIGILANCIA EM SAUDE                                               | Epiclin                                                                                                       | Fernando Hayashi Sant'Anna, Ana Paula Muterle, Janira Prichula, Juliana Comerlato, Carolina Comerlato, Eliana Márcia Da Ros Wendland                                                                                                                                                                                                                                                                                                                                           |
| EPI_ISL_1469766                                                                                                                                                                                                                                                                                                                                                                                                                                                                                                                                                                                                                                                                                                                                                                                                                                                                                                                                                                                                                                                                                                                                                                                                                                                                                                                                                                                                                                                                                                                                                | Coordenadoria Geral de Vigilância em Saúde - Vigilância em Saúde               | Epiclin                                                                                                       | Fernando Hayashi Sant'Anna, Ana Paula Muterle, Janira Prichula, Juliana Comerlato, Carolina Comerlato, Eliana Márcia Da Ros Wendland                                                                                                                                                                                                                                                                                                                                           |
| EPI_ISL_1469767                                                                                                                                                                                                                                                                                                                                                                                                                                                                                                                                                                                                                                                                                                                                                                                                                                                                                                                                                                                                                                                                                                                                                                                                                                                                                                                                                                                                                                                                                                                                                | Fundação de Saúde Pública de Novo Hamburgo                                     | Epiclin                                                                                                       | Fernando Hayashi Sant'Anna, Ana Paula Muterle, Janira Prichula, Juliana Comerlato, Carolina Comerlato, Eliana Márcia Da Ros Wendland                                                                                                                                                                                                                                                                                                                                           |
| EPI_ISL_1469774                                                                                                                                                                                                                                                                                                                                                                                                                                                                                                                                                                                                                                                                                                                                                                                                                                                                                                                                                                                                                                                                                                                                                                                                                                                                                                                                                                                                                                                                                                                                                | Hospital Universitário de Canoas                                               | Epiclin                                                                                                       | Fernando Hayashi Sant'Anna, Ana Paula Muterle, Janira Prichula, Juliana Comerlato, Carolina Comerlato, Eliana Márcia Da Ros Wendland                                                                                                                                                                                                                                                                                                                                           |
| EPI_ISL_1469781                                                                                                                                                                                                                                                                                                                                                                                                                                                                                                                                                                                                                                                                                                                                                                                                                                                                                                                                                                                                                                                                                                                                                                                                                                                                                                                                                                                                                                                                                                                                                | DIRETORIA DE VIGILANCIA EM SAUDE                                               | Epiclin                                                                                                       | Fernando Hayashi Sant'Anna, Ana Paula Muterle, Janira Prichula, Juliana Comerlato, Carolina Comerlato, Eliana Márcia Da Ros Wendland                                                                                                                                                                                                                                                                                                                                           |
| EPI_ISL_1469782                                                                                                                                                                                                                                                                                                                                                                                                                                                                                                                                                                                                                                                                                                                                                                                                                                                                                                                                                                                                                                                                                                                                                                                                                                                                                                                                                                                                                                                                                                                                                | COORDENADORIA GERAL DE VIGILANCIA EM SAUDE                                     | Epiclin                                                                                                       | Fernando Hayashi Sant'Anna, Ana Paula Muterle, Janira Prichula, Juliana Comerlato, Carolina Comerlato, Eliana Márcia Da Ros Wendland                                                                                                                                                                                                                                                                                                                                           |
| EPI_ISL_1469785                                                                                                                                                                                                                                                                                                                                                                                                                                                                                                                                                                                                                                                                                                                                                                                                                                                                                                                                                                                                                                                                                                                                                                                                                                                                                                                                                                                                                                                                                                                                                | FUNDAOCAO DE SAUDE PUBLICA DE NOVO HAMBURGO FSNH                               | Epiclin                                                                                                       | Fernando Hayashi Sant'Anna, Ana Paula Muterle, Janira Prichula, Juliana Comerlato, Carolina Comerlato, Eliana Márcia Da Ros Wendland                                                                                                                                                                                                                                                                                                                                           |
| EPI_ISL_1469791, EPI_ISL_1469798                                                                                                                                                                                                                                                                                                                                                                                                                                                                                                                                                                                                                                                                                                                                                                                                                                                                                                                                                                                                                                                                                                                                                                                                                                                                                                                                                                                                                                                                                                                               | DIRETORIA DE VIGILANCIA EM SAUDE                                               | Epiclin                                                                                                       | Fernando Hayashi Sant'Anna, Ana Paula Muterle, Janira Prichula, Juliana Comerlato, Carolina Comerlato, Eliana Márcia Da Ros Wendland                                                                                                                                                                                                                                                                                                                                           |
| EPI_ISL_1469802                                                                                                                                                                                                                                                                                                                                                                                                                                                                                                                                                                                                                                                                                                                                                                                                                                                                                                                                                                                                                                                                                                                                                                                                                                                                                                                                                                                                                                                                                                                                                | Diretoria de Vigilância em Saúde                                               | Epiclin                                                                                                       | Fernando Hayashi Sant'Anna, Ana Paula Muterle, Janira Prichula, Juliana Comerlato, Carolina Comerlato, Eliana Márcia Da Ros Wendland                                                                                                                                                                                                                                                                                                                                           |
| EPI_ISL_1469834                                                                                                                                                                                                                                                                                                                                                                                                                                                                                                                                                                                                                                                                                                                                                                                                                                                                                                                                                                                                                                                                                                                                                                                                                                                                                                                                                                                                                                                                                                                                                | HOSPITAL SAO FRANCISCO DE ASSIS                                                | Epiclin                                                                                                       | Fernando Hayashi Sant'Anna, Ana Paula Muterle, Janira Prichula, Juliana Comerlato, Carolina Comerlato, Eliana Márcia Da Ros Wendland                                                                                                                                                                                                                                                                                                                                           |
| EPI_ISL_1479119, EPI_ISL_1479121                                                                                                                                                                                                                                                                                                                                                                                                                                                                                                                                                                                                                                                                                                                                                                                                                                                                                                                                                                                                                                                                                                                                                                                                                                                                                                                                                                                                                                                                                                                               | DIRETORIA DE VIGILANCIA EM SAUDE                                               | Epiclin                                                                                                       | Fernando Hayashi Sant'Anna, Ana Paula Muterle, Janira Prichula, Juliana Comerlato, Carolina Comerlato, Eliana Márcia Da Ros Wendland                                                                                                                                                                                                                                                                                                                                           |
| EPI_ISL_1479124                                                                                                                                                                                                                                                                                                                                                                                                                                                                                                                                                                                                                                                                                                                                                                                                                                                                                                                                                                                                                                                                                                                                                                                                                                                                                                                                                                                                                                                                                                                                                | UNIDADE DE SAUDE NOVA HARTZ                                                    | Epiclin                                                                                                       | Fernando Hayashi Sant'Anna, Ana Paula Muterle, Janira Prichula, Juliana Comerlato, Carolina Comerlato, Eliana Márcia Da Ros Wendland                                                                                                                                                                                                                                                                                                                                           |
| EPI_ISL_1479125                                                                                                                                                                                                                                                                                                                                                                                                                                                                                                                                                                                                                                                                                                                                                                                                                                                                                                                                                                                                                                                                                                                                                                                                                                                                                                                                                                                                                                                                                                                                                | CENTRO DE REFERENCIA EM SINDROMES GRIPAIS                                      | Epiclin                                                                                                       | Fernando Hayashi Sant'Anna, Ana Paula Muterle, Janira Prichula, Juliana Comerlato, Carolina Comerlato, Eliana Márcia Da Ros Wendland                                                                                                                                                                                                                                                                                                                                           |
| EPI_ISL_1479126                                                                                                                                                                                                                                                                                                                                                                                                                                                                                                                                                                                                                                                                                                                                                                                                                                                                                                                                                                                                                                                                                                                                                                                                                                                                                                                                                                                                                                                                                                                                                | UNIDADE DE ATENDIMENTO DST AIDS TB E HAN                                       | Epiclin                                                                                                       | Fernando Hayashi Sant'Anna, Ana Paula Muterle, Janira Prichula, Juliana Comerlato, Carolina Comerlato, Eliana Márcia Da Ros Wendland                                                                                                                                                                                                                                                                                                                                           |
| EPI_ISL_1479128                                                                                                                                                                                                                                                                                                                                                                                                                                                                                                                                                                                                                                                                                                                                                                                                                                                                                                                                                                                                                                                                                                                                                                                                                                                                                                                                                                                                                                                                                                                                                | HOSPITAL SAO FRANCISCO DE ASSIS                                                | Epiclin                                                                                                       | Fernando Hayashi Sant'Anna, Ana Paula Muterle, Janira Prichula, Juliana Comerlato, Carolina Comerlato, Eliana Márcia Da Ros Wendland                                                                                                                                                                                                                                                                                                                                           |
| EPI_ISL_1630158                                                                                                                                                                                                                                                                                                                                                                                                                                                                                                                                                                                                                                                                                                                                                                                                                                                                                                                                                                                                                                                                                                                                                                                                                                                                                                                                                                                                                                                                                                                                                | Laboratório de Microbiologia Molecular - Universidade FEEVALE                  | Laboratório de Microbiologia Molecular - Universidade FEEVALE                                                 | Alana Witt Hansen, Fágner Henrique Heldt, Fernando Rosado Spilki, Flávio Silveira, Juliana Schons Gularte, Juliane Deise Fleck, Mariana Soares da Silva, Meriane Demoliner, Matheus Nunes Weber, Paula Rodrigues de Almeida, Micheli Filippi                                                                                                                                                                                                                                   |
| EPI_ISL_2038957, EPI_ISL_2038958                                                                                                                                                                                                                                                                                                                                                                                                                                                                                                                                                                                                                                                                                                                                                                                                                                                                                                                                                                                                                                                                                                                                                                                                                                                                                                                                                                                                                                                                                                                               | Laboratório Central de Saude Publica do Estado do Rio Grande do Sul (LACEN-RS) | Laboratory of Respiratory Viruses and Measles, Oswaldo Cruz Institute, FIOCRUZ                                | Paola Resende, Luciana Appolinario, Fernando Motta, Anna Carolina Paixao, Ana Carolina Mendonca, Alice Sampaio Rocha, Taina Venas, Elisa Cavalcante Pereira, Renata Serrano Lopes, Tatiana Schaffer Gregianini, Richard Salvato, Marilda Siqueira on behalf of the Fiocruz COVID-19 Genomic Surveillance Network                                                                                                                                                               |
| EPI_ISL_2249345, EPI_ISL_2249346, EPI_ISL_2249347, EPI_ISL_2249348, EPI_ISL_2249349, EPI_ISL_2249350, EPI_ISL_2249351, EPI_ISL_2249352, EPI_ISL_2249353, EPI_ISL_2249354, EPI_ISL_2249355, EPI_ISL_2249356, EPI_ISL_2249357, EPI_ISL_2249358, EPI_ISL_2249359, EPI_ISL_2249360, EPI_ISL_2249361, EPI_ISL_2249362, EPI_ISL_2249365, EPI_ISL_2249366, EPI_ISL_2249367, EPI_ISL_2249368, EPI_ISL_2249369, EPI_ISL_2249370, EPI_ISL_2249371, EPI_ISL_2249372, EPI_ISL_2249373, EPI_ISL_2249374, EPI_ISL_2249375, EPI_ISL_2249376, EPI_ISL_2249377, EPI_ISL_2249378, EPI_ISL_2249379, EPI_ISL_2249380, EPI_ISL_2249381, EPI_ISL_2249382, EPI_ISL_2249383, EPI_ISL_2249384, EPI_ISL_2249385, EPI_ISL_2249386                                                                                                                                                                                                                                                                                                                                                                                                                                                                                                                                                                                                                                                                                                                                                                                                                                                         | Laboratório Central de Saúde Pública do Rio Grande do Sul                      | Coordenação Geral de Laboratórios de Saúde Pública (CGLAB/DAEVS/SVS/MS)                                       | Vagner Fonseca, et al.                                                                                                                                                                                                                                                                                                                                                                                                                                                         |
| EPI_ISL_2344423, EPI_ISL_2344429, EPI_ISL_2344454, EPI_ISL_2344460, EPI_ISL_2344461                                                                                                                                                                                                                                                                                                                                                                                                                                                                                                                                                                                                                                                                                                                                                                                                                                                                                                                                                                                                                                                                                                                                                                                                                                                                                                                                                                                                                                                                            | Instituto Butantan                                                             | Instituto de Medicina Tropical de Sao Paulo                                                                   | Brazil-UK Centre for Arbovirus Discovery Diagnosis Genomics and Epidemiology (CADDE) Genomic Network - Instituto de Medicina Tropical                                                                                                                                                                                                                                                                                                                                          |
| EPI_ISL_2375797, EPI_ISL_2399432, EPI_ISL_2399433, EPI_ISL_2399434, EPI_ISL_2399435, EPI_ISL_2399436, EPI_ISL_2399437, EPI_ISL_2431429, EPI_ISL_2431431, EPI_ISL_2431433, EPI_ISL_2431436, EPI_ISL_2431437, EPI_ISL_2431440, EPI_ISL_2431441, EPI_ISL_2431843, EPI_ISL_2431844, EPI_ISL_2431846, EPI_ISL_2431848, EPI_ISL_2431852, EPI_ISL_2431855                                                                                                                                                                                                                                                                                                                                                                                                                                                                                                                                                                                                                                                                                                                                                                                                                                                                                                                                                                                                                                                                                                                                                                                                             | Laboratório de Microbiologia Molecular - Universidade FEEVALE                  | Molecular Microbiology Laboratory                                                                             | Alana Witt Hansen, Fágner Henrique Heldt, Fernando Rosado Spilki, Flávio Silveira, Juliana Schons Gularte, Juliane Deise Fleck, Mariana Soares da Silva, Meriane Demoliner, Matheus Nunes Weber, Paula Rodrigues de Almeida, Micheli Filippi                                                                                                                                                                                                                                   |
| EPI_ISL_2443674                                                                                                                                                                                                                                                                                                                                                                                                                                                                                                                                                                                                                                                                                                                                                                                                                                                                                                                                                                                                                                                                                                                                                                                                                                                                                                                                                                                                                                                                                                                                                | Laboratorio Central de Saude Publica do Estado do Rio Grande do Sul (LACEN-RS) | Laboratory of Respiratory Viruses and Measles, Oswaldo Cruz Institute, FIOCRUZ                                | Paola Resende, Luciana Appolinario, Fernando Motta, Anna Carolina Paixao, Ana Carolina Mendonca, Alice Sampaio Rocha, Taina Venas, Elisa Cavalcante Pereira, Renata Serrano Lopes, Tatiana Schaffer Gregianini, Richard Salvato, Marilda Siqueira on behalf of the Fiocruz COVID-19 Genomic Surveillance Network                                                                                                                                                               |
| EPI_ISL_770551, EPI_ISL_770552, EPI_ISL_770553, EPI_ISL_770554, EPI_ISL_770555, EPI_ISL_770556, EPI_ISL_770557, EPI_ISL_770558, EPI_ISL_770559, EPI_ISL_770560, EPI_ISL_770561, EPI_ISL_770562, EPI_ISL_770563, EPI_ISL_770564, EPI_ISL_770565, EPI_ISL_770566, EPI_ISL_770567, EPI_ISL_770568, EPI_ISL_770569, EPI_ISL_770570, EPI_ISL_770571, EPI_ISL_770572, EPI_ISL_770573, EPI_ISL_770574, EPI_ISL_770575, EPI_ISL_770576, EPI_ISL_770577, EPI_ISL_770578, EPI_ISL_770579, EPI_ISL_770580, EPI_ISL_770581, EPI_ISL_770582, EPI_ISL_770583, EPI_ISL_770584, EPI_ISL_770585, EPI_ISL_770586, EPI_ISL_770587, EPI_ISL_770588, EPI_ISL_770589, EPI_ISL_770590, EPI_ISL_770591, EPI_ISL_770592, EPI_ISL_770593, EPI_ISL_770594, EPI_ISL_770595, EPI_ISL_770596, EPI_ISL_770597, EPI_ISL_770598, EPI_ISL_770599, EPI_ISL_770600, EPI_ISL_770601, EPI_ISL_770602, EPI_ISL_770603, EPI_ISL_770604, EPI_ISL_770605, EPI_ISL_770606, EPI_ISL_770607, EPI_ISL_770608, EPI_ISL_770609, EPI_ISL_770610, EPI_ISL_770611, EPI_ISL_770612, EPI_ISL_770613, EPI_ISL_770614, EPI_ISL_770615, EPI_ISL_770616, EPI_ISL_770617, EPI_ISL_770618, EPI_ISL_770619, EPI_ISL_770620, EPI_ISL_770621, EPI_ISL_770622, EPI_ISL_770623, EPI_ISL_770624, EPI_ISL_770625, EPI_ISL_770626, EPI_ISL_770627, EPI_ISL_770628, EPI_ISL_770629, EPI_ISL_770630, EPI_ISL_779155, EPI_ISL_779156, EPI_ISL_779157, EPI_ISL_779158, EPI_ISL_779159, EPI_ISL_779160, EPI_ISL_779161, EPI_ISL_779162, EPI_ISL_779163, EPI_ISL_779164, EPI_ISL_779165, EPI_ISL_779166, EPI_ISL_779167, EPI_ISL_779168 | Laboratório de Microbiologia Molecular - Universidade FEEVALE                  | Bioinformatics Laboratory / LNCC                                                                              | Felipe Benites, Fernando Rosado Spilki, Alana Witt Hansen, Juliane Deise Fleck, Juliana Schons, Meriane Demoliner, Ana Karolina Eisen Antunes, Fagner Henrique Heldt, Larissa Mallmann, Bruna Hermann, Ana Luiza Ziulkoski, Vitoria Goes, Karoline Schallenberger, Matheus Nunes Weber, Paula Rodrigues de Almeida, Alessandra Pavan Lamarca da Silva, Ronaldo da Silva F Jr , Luiz G P de Almeida, Alexandre L Gerber , Ana Paula de C Guimarães, Ana Tereza R de Vasconcelos |
| EPI_ISL_831939, EPI_ISL_831940, EPI_ISL_832009, EPI_ISL_832010, EPI_ISL_832011, EPI_ISL_832012, EPI_ISL_832013                                                                                                                                                                                                                                                                                                                                                                                                                                                                                                                                                                                                                                                                                                                                                                                                                                                                                                                                                                                                                                                                                                                                                                                                                                                                                                                                                                                                                                                 | Laboratório de Microbiologia Molecular - Universidade FEEVALE                  | Universidade Federal de Ciências da Saúde de Porto Alegre                                                     | Vinicius Bonetti Franceschi, Amanda de Menezes Mayer, Gabriel Dickin Caldana, Carla Andretta Moreira Neves, Patricia Aline Gröhs Ferrareze, Gabriela Bettella Cybis, Ricardo Ariel Zimmerman, Livia Knetzsch, Fernando Rosado Spilki, Claudia Elizabeth Thompson                                                                                                                                                                                                               |
| EPI_ISL_943606, EPI_ISL_943607, EPI_ISL_943608, EPI_ISL_943609, EPI_ISL_943610                                                                                                                                                                                                                                                                                                                                                                                                                                                                                                                                                                                                                                                                                                                                                                                                                                                                                                                                                                                                                                                                                                                                                                                                                                                                                                                                                                                                                                                                                 | Central Laboratory of Public Health of Rio Grande do Sul (Lacen-RS)            | State Center for Health Surveillance of the Health Department of the State of Rio Grande do Sul (CEVS/SES-RS) | Aline Campos, Amanda da Silva, Anelise Schaurich, Claudia Dornelles, Cynthia Molina, Fernanda Godinho, Lara Crescente, Leticia Garay, Regina Barcellos, Richard Salvato, Tatiana Gregianini, Vagner Fonseca                                                                                                                                                                                                                                                                    |

EPI\_ISL\_983863, EPI\_ISL\_983864,  
EPI\_ISL\_983865, EPI\_ISL\_983867,  
EPI\_ISL\_983868, EPI\_ISL\_984619,  
EPI\_ISL\_984620, EPI\_ISL\_984621

Central Laboratory of Public Health of Rio Grande do Sul  
(Lacen-RS)

State Center for Health Surveillance of the Health Department  
of the State of Rio Grande do Sul (CEVS/SES-RS)

Aline Campos, Cynthia Molina, Lara Crescente, Leticia Garay, Ludmila Fiorenzano Baethgen, Richard Salvato, Tatiana Gregianini
